# Supplementary material for: DNA Methylation Mediated Control of Gene Expression Is Critical for Development of Crown Gall Tumors
Source: PLoS Genet. 2013 Feb 7;9(2):e1003267. doi: 10.1371/journal.pgen.1003267 (PMC3567176; doi:10.1371/journal.pgen.1003267)
Supplement: Table S2 — Enrichment of protein coding genes with differentially methylated regions (DMRs) in functional categories according to the pathway analysis program MapMan. One-sided Fisher's exact tests were employed to assess the significance of functional categories affected by differentially methylated genes. The table is sorted according to the column ‘FDR adjusted p-value’. Shown are only categories with a total number of at least 10 genes. (XLSX) [file pgen.1003267.s009.xlsx]

## Sheet: Table S2_Functional categories
Table S2. Enrichment of protein coding genes with differentially methylated regions (DMRs) in functional categories according to the pathway analysis program MapMan (29, 30). One-sided Fisher's exact tests were employed to assess the significance of functional categories affected by differentially methylated genes. The table is sorted according to the column 'FDR adjusted p-value'. Shown are only…
Category name	Gene number affected in category	Total gene number in category	Fold enrichment	FDR adjusted p-value	AGI codes	Gene names
development	72	315	1.95017	0.0015213	AT5G04040, AT1G33270, AT1G15270, AT1G69170, AT1G02065, AT1G50030, AT3G43660, AT2G06210, AT2G17040, AT1G29400, AT1G32870, AT3G45870, AT1G31280, AT2G23810, AT1G20640, AT2G03440, AT5G49680, AT4G16280, AT2G41260, AT2G32950, AT3G05680, AT3G44290, AT1G27595, AT1G28560, AT3G32316, AT1G63260, AT3G49660, AT4G10180, AT5G39500, AT1G66610, AT3G28070, AT1G66660, AT3G10480, AT5G27030, AT3G30340, AT5G37870, AT3…	Symbols: SDP1 | SDP1 (SUGAR-DEPENDENT1); triacylglycerol lipase | chr5:1089342-1093179 FORWARD ||| patatin-related | chr1:12068063-12070374 REVERSE ||| FUNCTIONS IN: molecular_function unknown; INVOLVED IN: biological_process unknown; LOCATED IN: plasma membrane; EXPRESSED IN: 24 plant structures; EXPRESSED DURING: 15 growth stages; CONTAINS InterPro DOMAIN/s: Translation machinery associated TMA…
development.unspecified	66	289	1.94542	0.0020223	AT3G43660, AT2G06210, AT2G17040, AT1G29400, AT1G32870, AT3G45870, AT1G31280, AT2G23810, AT1G20640, AT2G03440, AT5G49680, AT4G16280, AT2G41260, AT2G32950, AT3G05680, AT3G44290, AT1G27595, AT1G28560, AT3G32316, AT1G63260, AT3G49660, AT4G10180, AT5G39500, AT1G66610, AT3G28070, AT1G66660, AT3G10480, AT5G27030, AT3G30340, AT5G37870, AT3G13300, AT5G14120, AT3G45600, AT4G08300, AT4G00800, AT5G62380, AT1…	nodulin, putative | chr3:15565224-15566047 FORWARD ||| Symbols: ELF8, VIP6 | ELF8 (EARLY FLOWERING 8); binding | chr2:2428903-2436687 REVERSE ||| Symbols: anac036 | anac036 (Arabidopsis NAC domain containing protein 36); transcription factor | chr2:7407123-7408270 FORWARD ||| Symbols: AML5 | AML5 (ARABIDOPSIS MEI2-LIKE PROTEIN 5); RNA binding / nucleic acid binding / nucleotide binding | chr1:102…
cell	87	458	1.54033	0.0771323	AT3G10220, AT5G54280, AT2G34560, AT2G01910, AT3G55005, AT2G04740, AT3G63480, AT2G04750, AT4G14365, AT1G47750, AT1G62050, AT5G60930, AT4G03505, AT2G41740, AT4G25590, AT2G20290, AT5G37590, AT5G65274, AT1G51405, AT5G27000, AT2G21380, AT1G04160, AT5G62250, AT5G54610, AT2G38440, AT1G63640, AT5G65930, AT5G54620, AT5G20470, AT5G54710, AT3G61710, AT4G14150, AT5G43900, AT5G07660, AT5G03340, AT3G54670, AT5…	tubulin folding cofactor B | chr3:3161757-3164231 FORWARD ||| Symbols: ATM2, ATMYOS1, ATM4 | ATM2 (ARABIDOPSIS THALIANA MYOSIN 2); motor | chr5:22039389-22046298 REVERSE ||| katanin, putative | chr2:14560188-14562950 FORWARD ||| Symbols: ATMAP65-6, MAP65-6 | ATMAP65-6; microtubule binding | chr2:416911-420587 FORWARD ||| Symbols: TON1B | TON1B (tonneau 1b) | chr3:20383956-20386382 FORWARD ||| ank…
cell.division	18	60	2.79174	0.0820837	AT5G07660, AT5G03340, AT3G54670, AT5G49880, AT1G69400, AT2G32900, AT1G27060, AT1G49040, AT5G60870, AT5G48600, AT5G12350, AT3G52750, AT3G09840, AT2G27170, AT3G12280, AT1G78770, AT1G22275, AT1G69390	structural maintenance of chromosomes (SMC) family protein | chr5:2422839-2429912 FORWARD ||| cell division cycle protein 48, putative / CDC48, putative | chr5:809948-813228 REVERSE ||| Symbols: TTN8, SMC1, ATSMC1 | TTN8 (TITAN8); ATP binding / transporter | chr3:20235678-20243960 FORWARD ||| mitotic checkpoint family protein | chr5:20282165-20288084 FORWARD ||| transducin family protein / WD-40 …
misc.cytochrome P450	24	91	2.33557	0.0820837	AT1G50560, AT4G07031, AT4G15360, AT3G28740, AT2G05870, AT1G64900, AT1G50550, AT5G57260, AT4G12320, AT5G36140, AT3G26210, AT1G65340, AT5G42580, AT3G26270, AT5G47990, AT3G20080, AT3G48290, AT5G44620, AT2G23220, AT3G26310, AT1G66540, AT3G26320, AT1G55940, AT1G33730	Symbols: CYP705A25 | CYP705A25; electron carrier/ heme binding / iron ion binding / monooxygenase/ oxygen binding | chr1:18724207-18726272 FORWARD ||| transposable element gene | chr4:4106542-4107491 FORWARD ||| Symbols: CYP705A3 | CYP705A3; electron carrier/ heme binding / iron ion binding / monooxygenase/ oxygen binding | chr4:8770185-8771899 FORWARD ||| Symbols: CYP81D1 | CYP81D1; electron car…
signalling	120	686	1.39474	0.098432	AT5G52390, AT5G11180, AT3G29160, AT3G24929, AT1G07550, AT5G15730, AT2G27060, AT1G67510, AT1G10850, AT1G53730, AT1G63430, AT3G28040, AT1G53430, AT1G56145, AT3G23750, AT1G34110, AT1G72180, AT1G35710, AT4G08850, AT5G51350, AT4G11470, AT4G11500, AT4G11490, AT4G11480, AT4G04500, AT3G45860, AT4G04510, AT2G20300, AT1G66880, AT5G38210, AT1G51940, AT1G49270, AT4G32710, AT1G60987, AT1G61490, AT5G24080, AT3…	photoassimilate-responsive protein, putative | chr5:21263936-21265264 REVERSE ||| Symbols: ATGLR2.6, GLR2.6 | ATGLR2.6; intracellular ligand-gated ion channel | chr5:3557261-3561575 REVERSE ||| Symbols: AKIN11, SnRK1.2, KIN11 | AKIN11 (Arabidopsis SNF1 kinase homolog 11); protein binding / protein kinase | chr3:11128625-11132065 REVERSE ||| unknown protein | chr3:9104495-9105648 FORWARDweakly sim…
stress.biotic	73	385	1.53342	0.098432	AT1G33830, AT5G17880, AT3G48080, AT5G17890, AT5G24620, AT2G15130, AT1G56680, AT1G66100, AT4G19040, AT5G47260, AT2G35520, AT4G17910, AT1G78780, AT4G09950, AT1G65385, AT1G05760, AT2G15220, AT1G32370, AT4G26090, AT1G33930, AT3G10114, AT5G45080, AT5G45250, AT1G64070, AT1G27170, AT4G37460, AT2G17430, AT2G17480, AT5G42797, AT3G24020, AT4G16930, AT3G44630, AT1G66090, AT5G45230, AT1G10920, AT5G48780, AT2…	avirulence-responsive family protein / avirulence induced gene (AIG1) family protein | chr1:12279947-12281406 REVERSE ||| Symbols: CSA1 | CSA1 (constitutive shade-avoidance1); ATP binding / transmembrane receptor | chr5:5908874-5913099 REVERSE ||| lipase class 3 family protein / disease resistance protein-related | chr3:17752938-17755190 REVERSE ||| Symbols: DAR4 | DAR4 (DA1-RELATED PROTEIN 4); A…
cell.vesicle transport	25	102	2.11653	0.112276	AT3G10380, AT1G31730, AT4G12770, AT5G13990, AT3G61570, AT4G32760, AT4G02660, AT3G05710, AT1G54090, AT1G28490, AT1G21380, AT3G09740, AT2G38360, AT1G52360, AT4G22540, AT5G22770, AT4G10170, AT5G01760, AT4G11380, AT2G40380, AT2G18860, AT5G22780, AT3G27530, AT1G23900, AT5G12370	Symbols: SEC8, ATSEC8 | SEC8 (SUBUNIT OF EXOCYST COMPLEX 8) | chr3:3219523-3228933 REVERSE ||| epsilon-adaptin, putative | chr1:11359642-11364288 FORWARD ||| heat shock protein binding | chr4:7506382-7511566 REVERSE ||| Symbols: ATEXO70C2 | ATEXO70C2 (exocyst subunit EXO70 family protein C2); protein binding | chr5:4514568-4516892 REVERSE ||| Symbols: GC3, GDAP1 | GDAP1 (GRIP-RELATED ARF-BINDING …
protein	325	2130	1.19444	0.210879	AT1G28350, AT5G26830, AT2G04842, AT4G04350, AT4G10320, AT1G27160, AT4G39280, AT3G46100, AT5G03406, AT1G78910, AT2G33800, AT3G25920, AT2G16930, AT5G40950, AT3G03600, AT1G16870, AT4G37660, AT5G27820, AT2G24090, AT5G16200, AT1G66890, AT3G45020, AT3G45030, AT5G03850, AT3G04770, AT3G13580, AT4G10450, AT3G01790, AT1G22110, AT1G52300, AT2G25210, AT5G47700, AT3G24830, AT4G13170, AT3G49080, AT3G08720, AT5…	ATP binding / aminoacyl-tRNA ligase/ nucleotide binding / tyrosine-tRNA ligase | chr1:9944036-9949800 FORWARD ||| threonyl-tRNA synthetase / threonine--tRNA ligase (THRRS) | chr5:9437297-9441779 FORWARD ||| Symbols: EMB2761 | EMB2761 (EMBRYO DEFECTIVE 2761); ATP binding / aminoacyl-tRNA ligase/ ligase, forming aminoacyl-tRNA and related compounds / nucleotide binding / threonine-tRNA ligase | chr…
RNA.regulation of transcription.Histone acetyltransferases	6	13	5.56703	0.210879	AT5G64610, AT1G55970, AT1G16710, AT1G16705, AT1G79000, AT1G32750	Symbols: HAM1 | HAM1 (HISTONE ACETYLTRANSFERASE OF THE MYST FAMILY 1); H3/H4 histone acetyltransferase/ histone acetyltransferase/ nucleic acid binding / zinc ion binding | chr5:25828160-25830524 REVERSE ||| Symbols: HAC04, HAG04, HAC4, HAG4, HAC6 | HAC4 (HISTONE ACETYLTRANSFERASE OF THE CBP FAMILY 4); histone acetyltransferase | chr1:20932129-20938290 REVERSE ||| Symbols: HAC12 | HAC12 (histone …
protein.synthesis.ribosomal protein.prokaryotic.unknown organellar.50S subunit	6	13	5.56703	0.210879	AT4G37660, AT5G27820, AT2G24090, AT5G16200, AT1G66890, AT3G45020	ribosomal protein L12 family protein | chr4:17695496-17696270 FORWARD ||| ribosomal protein L18 family protein | chr5:9859854-9861129 FORWARD ||| ribosomal protein L35 family protein | chr2:10241964-10243614 FORWARD ||| 50S ribosomal protein-related | chr5:5289565-5290202 REVERSE ||| FUNCTIONS IN: molecular_function unknown; INVOLVED IN: biological_process unknown; LOCATED IN: chloroplast; EXPRES…
not assigned.no ontology	261	1686	1.21104	0.211941	AT3G16260, AT5G04990, AT4G34480, AT3G43880, AT4G27870, AT1G42470, AT3G09850, AT1G75200, AT5G23940, AT3G18845, AT1G65483, AT1G59650, AT5G01460, AT3G14120, AT4G28070, AT5G65280, AT2G46060, AT1G60990, AT1G33680, AT1G61150, AT1G80970, AT5G59490, AT5G35560, AT5G06265, AT5G53050, AT4G15520, AT5G05520, AT3G48650, AT2G15280, AT4G16765, AT5G53730, AT1G61900, AT1G60995, AT3G07180, AT5G10950, AT5G58780, AT1…	Symbols: TRZ4 | TRZ4 (TRNASE Z 4); 3-tRNA processing endoribonuclease/ catalytic | chr3:5509374-5513204 FORWARD ||| sad1/unc-84 protein-related | chr5:1471481-1473964 REVERSE ||| catalytic/ cation binding / hydrolase, hydrolyzing O-glycosyl compounds | chr4:16480934-16483995 REVERSE ||| unknown protein | chr3:15738173-15738616 REVERSE ||| integral membrane family protein | chr4:13878923-13882882 …
amino acid metabolism.synthesis.aspartate family	8	23	3.46532	0.329884	AT2G36880, AT4G01850, AT3G63250, AT2G43910, AT5G49810, AT5G52100, AT4G33680, AT5G21060	Symbols: MAT3 | MAT3 (methionine adenosyltransferase 3); copper ion binding / methionine adenosyltransferase | chr2:15479366-15481412 REVERSE ||| Symbols: SAM-2, MAT2 | SAM-2 (S-ADENOSYLMETHIONINE SYNTHETASE 2); copper ion binding / methionine adenosyltransferase | chr4:796097-798286 REVERSE ||| Symbols: HMT-2, ATHMT-2, HMT2 | HMT2 (HOMOCYSTEINE METHYLTRANSFERASE 2); homocysteine S-methyltransfer…
RNA.regulation of transcription.unclassified	33	163	1.65472	0.365553	AT5G37340, AT5G33340, AT4G23540, AT4G12040, AT4G24015, AT5G33350, AT1G43850, AT4G15080, AT1G45207, AT5G55580, AT4G19000, AT1G09750, AT1G61990, AT2G14255, AT3G54826, AT5G45120, AT4G26000, AT3G21480, AT2G36480, AT1G49600, AT2G39830, AT3G17611, AT2G24830, AT1G08910, AT5G39995, AT5G16680, AT1G20280, AT3G26935, AT2G15910, AT3G50050, AT3G06410, AT4G01920, AT5G23930	zinc finger (ZPR1-type) family protein | chr5:14787264-14792771 REVERSE ||| Symbols: CDR1 | CDR1 (CONSTITUTIVE DISEASE RESISTANCE 1); aspartic-type endopeptidase | chr5:12594467-12595952 FORWARD ||| binding | chr4:12280413-12286420 REVERSE ||| zinc finger (AN1-like) family protein | chr4:7214703-7215989 FORWARD ||| zinc finger (RING-H2 type) protein-related | chr4:12469742-12471261 REVERSE ||| ps…
misc	106	641	1.29793	0.373354	AT2G26750, AT1G13560, AT1G35420, AT4G15550, AT3G24040, AT3G15940, AT4G15480, AT3G01040, AT5G62220, AT4G38270, AT5G38040, AT5G07720, AT5G03490, AT2G20810, AT5G36890, AT1G67490, AT1G61810, AT3G23640, AT5G63800, AT5G20710, AT2G32810, AT1G45130, AT5G13980, AT3G26140, AT1G18650, AT1G62095, AT1G66250, AT3G07320, AT1G32860, AT4G01130, AT4G16570, AT1G51990, AT1G21120, AT1G14120, AT4G13260, AT1G62810, AT3…	epoxide hydrolase, putative | chr2:11395896-11397092 REVERSE ||| Symbols: AAPT1, ATAAPT1 | AAPT1 (AMINOALCOHOLPHOSPHOTRANSFERASE 1); phosphatidyltransferase/ phosphotransferase, for other substituted phosphate groups | chr1:4638514-4642104 REVERSE ||| dienelactone hydrolase family protein | chr1:13026289-13027667 FORWARD ||| Symbols: IAGLU | IAGLU (INDOLE-3-ACETATE BETA-D-GLUCOSYLTRANSFERASE); UD…
secondary metabolism.phenylpropanoids	10	34	2.70803	0.373354	AT4G13262, AT5G42830, AT1G77670, AT2G22570, AT5G01210, AT1G35513, AT1G31490, AT3G50740, AT2G30490, AT4G36220	pseudogene, Phosphoribosylanthranilate transferase, similar to Phosphoribosylanthranilate transferase; blastp match of 28% identity and 1.1e-27 P-value to GP|1396054|dbj|BAA13032.1||D86180 phosphoribosylanthranilate transferase {Pisum sativum} | chr4:7709660-7710727 REVERSE ||| transferase family protein | chr5:17176384-17178018 FORWARD ||| aminotransferase class I and II family protein | chr1:29…
signalling.phosphinositides	10	34	2.70803	0.373354	AT3G59770, AT2G15900, AT1G22620, AT3G56600, AT2G17930, AT1G64460, AT3G14205, AT1G34260, AT2G41210, AT3G47290	Symbols: SAC9 | SAC9; inositol or phosphatidylinositol phosphatase | chr3:22079033-22086149 REVERSE ||| phox (PX) domain-containing protein | chr2:6927390-6932704 FORWARD ||| Symbols: ATSAC1 | ATSAC1 (suppressor of actin 1); phosphatidylinositol-4,5-bisphosphate 5-phosphatase | chr1:7997676-8002944 REVERSE ||| inositol or phosphatidylinositol kinase/ phosphotransferase, alcohol group as acceptor …
protein.degradation	167	1068	1.21708	0.385189	AT1G23440, AT1G73170, AT1G59550, AT5G13520, AT5G05740, AT5G05030, AT1G23465, AT1G67690, AT1G01650, AT5G20660, AT2G14260, AT1G63770, AT5G22860, AT4G23040, AT2G24280, AT1G67420, AT1G01900, AT4G15040, AT1G30600, AT3G14240, AT4G21980, AT1G03380, AT2G44140, AT1G20850, AT1G55350, AT3G06910, AT3G26530, AT5G17080, AT5G03330, AT1G03220, AT3G20015, AT5G36260, AT1G01300, AT4G20850, AT5G47040, AT5G54745, AT5…	pyrrolidone-carboxylate peptidase family protein | chr1:8321680-8324240 FORWARD ||| ATP binding / ATP-dependent peptidase/ nucleoside-triphosphatase/ nucleotide binding / serine-type endopeptidase | chr1:27511661-27514797 REVERSE ||| UBX domain-containing protein | chr1:21879649-21880788 REVERSE ||| peptidase M1 family protein | chr5:4341948-4344671 REVERSE ||| Symbols: ATEGY2, EGY2 | EGY2; metal…
stress	97	586	1.29829	0.385189	AT1G33830, AT5G17880, AT3G48080, AT5G17890, AT5G24620, AT2G15130, AT1G56680, AT1G66100, AT4G19040, AT5G47260, AT2G35520, AT4G17910, AT1G78780, AT4G09950, AT1G65385, AT1G05760, AT2G15220, AT1G32370, AT4G26090, AT1G33930, AT3G10114, AT5G45080, AT5G45250, AT1G64070, AT1G27170, AT4G37460, AT2G17430, AT2G17480, AT5G42797, AT3G24020, AT4G16930, AT3G44630, AT1G66090, AT5G45230, AT1G10920, AT5G48780, AT2…	avirulence-responsive family protein / avirulence induced gene (AIG1) family protein | chr1:12279947-12281406 REVERSE ||| Symbols: CSA1 | CSA1 (constitutive shade-avoidance1); ATP binding / transmembrane receptor | chr5:5908874-5913099 REVERSE ||| lipase class 3 family protein / disease resistance protein-related | chr3:17752938-17755190 REVERSE ||| Symbols: DAR4 | DAR4 (DA1-RELATED PROTEIN 4); A…
signalling.receptor kinases	48	266	1.43626	0.385189	AT3G24929, AT1G07550, AT5G15730, AT2G27060, AT1G67510, AT1G10850, AT1G53730, AT1G63430, AT3G28040, AT1G53430, AT1G56145, AT3G23750, AT1G34110, AT1G72180, AT1G35710, AT4G08850, AT5G51350, AT4G11470, AT4G11500, AT4G11490, AT4G11480, AT4G04500, AT3G45860, AT4G04510, AT2G20300, AT1G66880, AT5G38210, AT1G51940, AT1G49270, AT4G32710, AT1G60987, AT1G61490, AT5G24080, AT3G12000, AT1G21230, AT3G59420, AT1…	unknown protein | chr3:9104495-9105648 FORWARDweakly similar to ( 131)AT5G38260serine/threonine protein kinase, putative | chr5:15300922-15303067 REVERSE ||| leucine-rich repeat protein kinase, putative | chr1:2322653-2326561 REVERSE ||| serine/threonine protein kinase, putative | chr5:5130503-5133187 FORWARD ||| ATP binding / protein binding / protein kinase/ protein serine/threonine kinase/ pro…
cell wall.cellulose synthesis	7	21	3.24753	0.385189	AT3G07330, AT1G23480, AT2G21770, AT5G44030, AT4G24010, AT5G05170, AT3G29810	Symbols: ATCSLC06, CSLC06, ATCSLC6 | ATCSLC6 (CELLULOSE-SYNTHASE LIKE C6); cellulose synthase/ transferase, transferring glycosyl groups | chr3:2335612-2339100 REVERSE ||| Symbols: ATCSLA03, CSLA03, ATCSLA3 | ATCSLA03 (CELLULOSE SYNTHASE-LIKE A3); cellulose synthase/ transferase, transferring glycosyl groups | chr1:8333020-8336385 FORWARD ||| Symbols: CESA9, CESA09 | CESA9 (CELLULOSE SYNTHASE A9)…
misc.oxidases - copper, flavone etc.	11	42	2.30615	0.404046	AT1G14120, AT4G13260, AT1G62810, AT3G43670, AT1G14130, AT2G32300, AT5G56470, AT1G24340, AT4G36090, AT4G14940, AT3G24200	2-oxoglutarate-dependent dioxygenase, putative | chr1:4833518-4835089 REVERSE ||| Symbols: YUC2 | YUC2 (YUCCA2); FAD binding / NADP or NADPH binding / flavin-containing monooxygenase/ oxidoreductase | chr4:7721618-7723989 REVERSE ||| copper amine oxidase, putative | chr1:23257726-23261966 REVERSE ||| copper amine oxidase, putative | chr3:15567099-15569901 FORWARD ||| 2-oxoglutarate-dependent diox…
stress.biotic.PR-proteins	45	250	1.43124	0.416623	AT5G42797, AT3G24020, AT4G16930, AT3G44630, AT1G66090, AT5G45230, AT1G10920, AT5G48780, AT2G05117, AT4G16920, AT5G47280, AT5G48770, AT5G45060, AT5G51630, AT3G11010, AT1G58602, AT4G19470, AT2G10535, AT1G27180, AT5G43740, AT5G45240, AT5G41750, AT1G60986, AT1G61180, AT1G63350, AT1G72900, AT4G11170, AT3G24900, AT4G11210, AT2G14080, AT2G25240, AT5G50423, AT1G63535, AT5G48605, AT2G20465, AT1G55010, AT2…	Symbols: LCR28 | LCR28 (Low-molecular-weight cysteine-rich 28) | chr5:17163196-17163574 FORWARD ||| disease resistance-responsive family protein | chr3:8678738-8679656 FORWARD ||| disease resistance protein (TIR-NBS-LRR class), putative | chr4:9529564-9530115 REVERSE ||| disease resistance protein RPP1-WsB-like (TIR-NBS-LRR class), putative | chr3:16195984-16200595 FORWARD ||| disease resistance …
signalling.G-proteins	26	130	1.62751	0.416623	AT1G48570, AT2G03150, AT4G35950, AT1G04830, AT4G39520, AT3G05310, AT5G61530, AT4G18800, AT3G60860, AT3G46060, AT5G08650, AT2G21880, AT5G05940, AT5G60860, AT5G13300, AT4G01090, AT4G09720, AT1G31650, AT5G12150, AT3G51300, AT4G02730, AT4G34390, AT5G06120, AT1G08340, AT1G52380, AT1G60860	zinc finger (Ran-binding) family protein | chr1:17955278-17957719 REVERSE ||| Symbols: emb1579 | emb1579 (embryo defective 1579); binding / calcium ion binding | chr2:951933-959188 FORWARD ||| Symbols: ARAC6, RAC2, ATROP5, ATRAC6, ROP5 | ARAC6 (ARABIDOPSIS RAC-LIKE 6); GTP binding | chr4:17023837-17025863 REVERSE ||| RabGAP/TBC domain-containing protein | chr1:1358917-1361981 REVERSE ||| GTP-bind…
minor CHO metabolism	14	59	2.02277	0.416623	AT1G60450, AT2G22190, AT4G18010, AT5G61760, AT1G05630, AT1G19600, AT1G48430, AT5G57330, AT3G01590, AT1G04420, AT3G07160, AT1G06490, AT3G59100, AT4G04970, AT5G52390, AT5G11180, AT3G29160, AT3G24929, AT1G07550, AT5G15730, AT2G27060, AT1G67510, AT1G10850, AT1G53730, AT1G63430, AT3G28040, AT1G53430, AT1G56145, AT3G23750, AT1G34110, AT1G72180, AT1G35710, AT4G08850, AT5G51350, AT4G11470, AT4G11500, AT4…	Symbols: AtGolS7 | AtGolS7 (Arabidopsis thaliana galactinol synthase 7); transferase, transferring glycosyl groups / transferase, transferring hexosyl groups | chr1:22271226-22273214 REVERSE ||| catalytic/ trehalose-phosphatase | chr2:9433765-9436544 REVERSE ||| Symbols: IP5PII, AT5PTASE2 | AT5PTASE2 (MYO-INOSITOL POLYPHOSPHATE 5-PHOSPHATASE 2); inositol-polyphosphate 5-phosphatase | chr4:9991012…
protein.synthesis.ribosomal protein.prokaryotic	12	49	2.10794	0.446324	AT2G33800, AT3G25920, AT2G16930, AT5G40950, AT3G03600, AT1G16870, AT4G37660, AT5G27820, AT2G24090, AT5G16200, AT1G66890, AT3G45020	ribosomal protein S5 family protein | chr2:14300772-14302430 REVERSE ||| Symbols: RPL15 | RPL15; structural constituent of ribosome | chr3:9491055-9492635 REVERSE ||| ribosomal protein L27 family protein | chr2:7341120-7342302 FORWARD ||| Symbols: RPL27 | RPL27 (RIBOSOMAL PROTEIN LARGE SUBUNIT 27); structural constituent of ribosome | chr5:16410782-16412063 FORWARD ||| Symbols: RPS2 | RPS2 (RIBOS…
protein.synthesis.ribosomal protein.prokaryotic.unknown organellar	6	18	3.24655	0.446324	AT4G37660, AT5G27820, AT2G24090, AT5G16200, AT1G66890, AT3G45020	ribosomal protein L12 family protein | chr4:17695496-17696270 FORWARD ||| ribosomal protein L18 family protein | chr5:9859854-9861129 FORWARD ||| ribosomal protein L35 family protein | chr2:10241964-10243614 FORWARD ||| 50S ribosomal protein-related | chr5:5289565-5290202 REVERSE ||| FUNCTIONS IN: molecular_function unknown; INVOLVED IN: biological_process unknown; LOCATED IN: chloroplast; EXPRES…
signalling.receptor kinases.DUF 26	7	23	2.84123	0.455743	AT4G11470, AT4G11500, AT4G11490, AT4G11480, AT4G04500, AT3G45860, AT4G04510	protein kinase family protein | chr4:6967729-6970161 FORWARD ||| pseudogene, similar to putative receptor-like serine-threonine protein kinase, blastp match of 59% identity and 6.5e-66 P-value to GP|18076583|emb|CAC84552.1||AJ306626 putative receptor-like serine-threonine protein kinase {Solanum tuberosum} | chr4:6982597-6983619 FORWARD ||| protein kinase family protein | chr4:6978848-6981548 FOR…
RNA	209	1400	1.1511	0.498943	AT4G31200, AT5G55100, AT1G60170, AT1G09760, AT5G51660, AT2G17580, AT5G20040, AT3G13300, AT1G30590, AT4G02840, AT3G01150, AT2G47990, AT5G14580, AT1G17760, AT2G36660, AT1G80070, AT1G10320, AT2G33340, AT1G03140, AT4G14342, AT1G54080, AT3G13570, AT5G61140, AT2G35340, AT4G18465, AT3G62310, AT2G25100, AT1G60080, AT5G02250, AT3G20420, AT3G04480, AT5G25800, AT2G19910, AT5G15700, AT3G18090, AT5G24120, AT4…	SWAP (Suppressor-of-White-APricot)/surp domain-containing protein | chr4:15161636-15164914 REVERSE ||| SWAP (Suppressor-of-White-APricot)/surp domain-containing protein | chr5:22361159-22364780 REVERSE ||| Symbols: emb1220 | emb1220 (embryo defective 1220) | chr1:22192773-22195400 FORWARD ||| Symbols: U2A | U2A (U2 small nuclear ribonucleoprotein A); protein binding | chr1:3159125-3161692 REVERSE…
RNA.regulation of transcription	154	1040	1.13567	0.498943	AT5G20510, AT5G26210, AT3G11020, AT2G40220, AT1G25560, AT5G18560, AT1G80580, AT1G63040, AT5G62000, AT3G23690, AT5G50915, AT1G68920, AT1G06150, AT5G09750, AT1G06149, AT1G78600, AT4G21040, AT3G20750, AT1G69180, AT1G27730, AT1G43850, AT1G34370, AT3G20880, AT2G15271, AT5G43630, AT5G40880, AT4G29000, AT1G47870, AT1G63100, AT3G49950, AT3G18380, AT1G62990, AT1G28420, AT2G17950, AT3G17050, AT1G44890, AT4…	Symbols: AL5 | AL5 (ALFIN-LIKE 5); DNA binding / methylated histone residue binding | chr5:6939813-6942908 REVERSE ||| Symbols: AL4 | AL4 (ALFIN-LIKE 4); DNA binding / methylated histone residue binding | chr5:9158318-9160383 REVERSE ||| Symbols: DREB2B, DREB2 | DREB2B (DRE/CRT-BINDING PROTEIN 2B); DNA binding / transcription activator/ transcription factor | chr3:3455355-3457214 FORWARD ||| Symb…
protein.degradation.ubiquitin	118	751	1.21951	0.498943	AT1G64470, AT2G46500, AT1G04850, AT1G53950, AT5G15400, AT2G24640, AT5G50430, AT1G19270, AT1G65130, AT2G16920, AT5G48700, AT3G13235, AT4G06599, AT1G53980, AT2G30110, AT5G05080, AT2G02760, AT2G32790, AT2G33770, AT1G70320, AT1G55860, AT1G22510, AT5G62460, AT5G37280, AT4G03510, AT2G17730, AT3G48070, AT1G27910, AT4G03965, AT2G25360, AT1G22500, AT4G01023, AT5G42940, AT4G26400, AT1G45180, AT5G40140, AT1…	ubiquitin family protein | chr1:23944722-23945772 REVERSE ||| phosphatidylinositol 3- and 4-kinase family protein / ubiquitin family protein | chr2:19086561-19088964 REVERSE ||| ubiquitin-associated (UBA)/TS-N domain-containing protein | chr1:1365118-1368844 REVERSE ||| ubiquitin family protein | chr1:20146448-20147988 REVERSE ||| U-box domain-containing protein | chr5:4997611-5003140 REVERSE |||…
transport	71	448	1.22772	0.498943	AT1G59820, AT2G21410, AT2G16510, AT3G28710, AT3G42050, AT2G20780, AT1G54730, AT5G17010, AT2G22730, AT1G21070, AT3G03090, AT3G54830, AT3G13620, AT3G55740, AT3G46980, AT3G26570, AT1G48230, AT1G79900, AT1G12480, AT5G48970, AT5G26200, AT5G17400, AT5G24030, AT1G44750, AT5G26820, AT5G44790, AT4G18790, AT3G46900, AT5G03280, AT1G68570, AT1G27080, AT1G22540, AT1G22550, AT5G53520, AT5G22830, AT2G03620, AT5…	Symbols: ALA3 | ALA3 (Aminophospholipid ATPase3); ATPase, coupled to transmembrane movement of ions, phosphorylative mechanism / phospholipid transporter | chr1:22011328-22020294 FORWARD ||| Symbols: VHA-A2 | VHA-A2 (VACUOLAR PROTON ATPASE A2); ATPase | chr2:9162620-9168452 FORWARD ||| vacuolar ATP synthase 16 kDa proteolipid subunit 5 / V-ATPase 16 kDa proteolipid subunit 5 (AVAP5) | chr2:715962…
lipid metabolism	35	193	1.44256	0.498943	AT1G36160, AT1G36180, AT1G62640, AT1G74960, AT1G47780, AT4G13050, AT1G30520, AT5G36880, AT5G27200, AT5G05580, AT1G51260, AT3G18850, AT5G58560, AT4G16700, AT4G25970, AT5G40420, AT5G40610, AT1G64720, AT1G54570, AT3G19260, AT2G38010, AT2G19880, AT2G43420, AT3G03310, AT5G24210, AT4G16070, AT4G13550, AT1G31480, AT1G52570, AT5G55480, AT4G14430, AT4G14440, AT4G00520, AT1G01710, AT4G29010	Symbols: ACC1, AT-ACC1, EMB22, GK, PAS3 | ACC1 (ACETYL-COENZYME A CARBOXYLASE 1); acetyl-CoA carboxylase | chr1:13534165-13544008 FORWARD ||| Symbols: ACC2 | ACC2 (ACETYL-COA CARBOXYLASE 2); acetyl-CoA carboxylase | chr1:13545972-13558492 FORWARD ||| Symbols: KAS III | KAS III (3-KETOACYL-ACYL CARRIER PROTEIN SYNTHASE III); 3-oxoacyl-[acyl-carrier-protein] synthase/ catalytic/ transferase, transf…
hormone metabolism	32	176	1.4466	0.498943	AT3G43600, AT1G52340, AT5G53820, AT1G51780, AT5G35570, AT1G05180, AT3G02260, AT1G48660, AT1G29490, AT2G33310, AT2G34680, AT5G64600, AT2G16530, AT5G24140, AT2G22830, AT2G17820, AT4G11280, AT4G08040, AT2G22810, AT3G23240, AT2G44840, AT1G66340, AT3G46500, AT1G52820, AT1G05160, AT1G44090, AT3G11540, AT1G60300, AT2G14060, AT5G38020, AT3G21950, AT5G37970	Symbols: AAO2 | AAO2 (ALDEHYDE OXIDASE 2); aldehyde oxidase | chr3:15512607-15517506 REVERSE ||| Symbols: ABA2, SIS4, GIN1, SDR1, ISI4, SRE1, ATABA2, ATSDR1 | ABA2 (ABA DEFICIENT 2); alcohol dehydrogenase/ oxidoreductase/ xanthoxin dehydrogenase | chr1:19489794-19491648 REVERSE ||| unknown protein | chr5:21853397-21854117 FORWARD ||| Symbols: ILL5 | ILL5; IAA-amino acid conjugate hydrolase/ metal…
protein.synthesis.ribosomal protein	25	145	1.35423	0.498943	AT2G33800, AT3G25920, AT2G16930, AT5G40950, AT3G03600, AT1G16870, AT4G37660, AT5G27820, AT2G24090, AT5G16200, AT1G66890, AT3G45020, AT3G45030, AT5G03850, AT3G04770, AT3G13580, AT4G10450, AT3G01790, AT1G22110, AT1G52300, AT2G25210, AT5G47700, AT3G24830, AT4G13170, AT3G49080	ribosomal protein S5 family protein | chr2:14300772-14302430 REVERSE ||| Symbols: RPL15 | RPL15; structural constituent of ribosome | chr3:9491055-9492635 REVERSE ||| ribosomal protein L27 family protein | chr2:7341120-7342302 FORWARD ||| Symbols: RPL27 | RPL27 (RIBOSOMAL PROTEIN LARGE SUBUNIT 27); structural constituent of ribosome | chr5:16410782-16412063 FORWARD ||| Symbols: RPS2 | RPS2 (RIBOS…
amino acid metabolism	22	121	1.44465	0.498943	AT5G25320, AT5G11520, AT2G38400, AT3G55610, AT2G37500, AT2G36880, AT4G01850, AT3G63250, AT2G43910, AT5G49810, AT5G52100, AT4G33680, AT5G21060, AT1G18640, AT3G29200, AT2G04400, AT1G71920, AT4G08900, AT5G09300, AT4G14430, AT4G14440, AT2G03730	ACT domain-containing protein | chr5:8787403-8789530 REVERSE ||| Symbols: ASP3, YLS4 | ASP3 (ASPARTATE AMINOTRANSFERASE 3); L-aspartate:2-oxoglutarate aminotransferase | chr5:3685089-3687764 REVERSE ||| Symbols: AGT3 | AGT3 (ALANINE:GLYOXYLATE AMINOTRANSFERASE 3); alanine-glyoxylate transaminase/ catalytic/ pyridoxal phosphate binding / transaminase | chr2:16083689-16086349 FORWARD ||| Symbols: P…
RNA.regulation of transcription.putative transcription regulator	19	101	1.50605	0.498943	AT5G04290, AT1G02080, AT2G25640, AT1G56110, AT1G03530, AT5G60170, AT3G17450, AT3G24870, AT1G51540, AT3G20280, AT3G43240, AT4G11560, AT5G19490, AT3G02400, AT4G01960, AT1G59453, AT1G59890, AT5G25520, AT5G47430	Symbols: KTF1 | KTF1 (KOW DOMAIN-CONTAINING TRANSCRIPTION FACTOR 1); nucleotide binding | chr5:1196069-1202653 FORWARD ||| transcriptional regulator-related | chr1:373501-386847 FORWARD ||| zinc ion binding | chr2:10910498-10913969 FORWARD ||| Symbols: NOP56 | NOP56 (Arabidopsis homolog of nucleolar protein Nop56) | chr1:20984389-20986951 REVERSE ||| Symbols: ATNAF1, NAF1 | NAF1 (NUCLEAR ASSEMBLY…
signalling.receptor kinases.misc	12	59	1.65834	0.498943	AT1G51840, AT2G14440, AT3G22010, AT3G05990, AT1G62090, AT3G21945, AT1G33670, AT5G06940, AT1G51850, AT1G69270, AT3G22020, AT1G51790	protein kinase-related | chr1:19249449-19250709 REVERSE ||| leucine-rich repeat protein kinase, putative | chr2:6143073-6147419 FORWARD ||| receptor-like protein kinase-related | chr3:7754311-7755762 FORWARD ||| leucine-rich repeat family protein | chr3:1796852-1799870 REVERSE ||| pseudogene, protein kinase family, similar to light repressible receptor protein kinase (LRRPK) (Arabidopsis thaliana…
signalling.light	12	57	1.73228	0.498943	AT1G80010, AT5G48800, AT2G47860, AT3G22380, AT2G47590, AT4G12850, AT1G67900, AT2G32250, AT3G59470, AT1G51790, AT5G28490, AT2G26990	Symbols: FRS8 | FRS8 (FAR1-related sequence 8); zinc ion binding | chr1:30097401-30099846 FORWARD ||| phototropic-responsive NPH3 family protein | chr5:19786764-19789129 FORWARD ||| phototropic-responsive NPH3 family protein | chr2:19599979-19602192 FORWARD ||| Symbols: TIC | TIC (TIME FOR COFFEE) | chr3:7912905-7919510 FORWARD ||| Symbols: PHR2 | PHR2 (photolyase/blue-light receptor 2); DNA phot…
major CHO metabolism	11	56	1.58724	0.498943	AT5G11110, AT3G54270, AT2G36390, AT2G39930, AT4G10260, AT5G22510, AT2G19860, AT1G50460, AT4G26620, AT3G23640, AT3G46970, AT1G33830, AT5G17880, AT3G48080, AT5G17890, AT5G24620, AT2G15130, AT1G56680, AT1G66100, AT4G19040, AT5G47260, AT2G35520, AT4G17910, AT1G78780, AT4G09950, AT1G65385, AT1G05760, AT2G15220, AT1G32370, AT4G26090, AT1G33930, AT3G10114, AT5G45080, AT5G45250, AT1G64070, AT1G27170, AT4…	Symbols: SPS1, ATSPS2F, KNS2 | ATSPS2F (SUCROSE PHOSPHATE SYNTHASE 2F); sucrose-phosphate synthase | chr5:3536226-3541133 FORWARD ||| sucrose-phosphatase 3 (SPP3) | chr3:20087082-20089846 REVERSE ||| Symbols: SBE2.1, BE3 | SBE2.1 (starch branching enzyme 2.1); 1,4-alpha-glucan branching enzyme | chr2:15264237-15270092 FORWARD ||| Symbols: ISA1, ATISA1 | ISA1 (ISOAMYLASE 1); alpha-amylase/ isoamyl…
transport.misc	12	56	1.77176	0.498943	AT1G71870, AT4G36790, AT3G03620, AT4G39180, AT3G62770, AT4G39170, AT1G15180, AT5G54750, AT1G75370, AT1G72560, AT1G17500, AT2G26510	MATE efflux family protein | chr1:27032456-27034895 REVERSE ||| transporter-related | chr4:17336172-17338371 FORWARD ||| MATE efflux family protein | chr3:873749-876800 REVERSE ||| Symbols: SEC14, ATSEC14 | SEC14; phosphatidylinositol transporter | chr4:18243774-18248805 REVERSE ||| Symbols: AtATG18a | AtATG18a | chr3:23218633-23221232 REVERSE ||| SEC14 cytosolic factor, putative / phosphoglyceri…
DNA.repair	9	44	1.66935	0.498943	AT4G25290, AT3G28030, AT2G31970, AT5G43530, AT5G54090, AT1G27410, AT5G16630, AT1G52500, AT1G30480	DNA photolyase | chr4:12941242-12944994 REVERSE ||| Symbols: UVH3, UVR1 | UVH3 (ULTRAVIOLET HYPERSENSITIVE 3); DNA binding / catalytic/ endonuclease/ nuclease/ single-stranded DNA binding | chr3:10424253-10431204 FORWARD ||| Symbols: RAD50, ATRAD50 | RAD50; ATP binding / nuclease/ zinc ion binding | chr2:13600491-13609069 FORWARD ||| SNF2 domain-containing protein / helicase domain-containing pro…
Co-factor and vitamine metabolism	8	37	1.79081	0.498943	AT1G04640, AT5G49970, AT3G24030, AT1G22940, AT2G17340, AT1G60440, AT1G68890, AT2G16710	Symbols: LIP2 | LIP2 (LIPOYLTRANSFERASE 2); lipoyltransferase | chr1:1292080-1293357 FORWARD ||| Symbols: ATPPOX, PDX3 | ATPPOX (A. THALIANA PYRIDOXIN (PYRODOXAMINE) 5-PHOSPHATE OXIDASE); pyridoxamine-phosphate oxidase | chr5:20329187-20333155 FORWARD ||| hydroxyethylthiazole kinase family protein | chr3:8679552-8680824 REVERSE ||| Symbols: TH1, TH-1, THIE | TH1 (THIAMINE REQUIRING 1); hydroxymet…
major CHO metabolism.degradation	7	32	1.81737	0.498943	AT4G10260, AT5G22510, AT2G19860, AT1G50460, AT4G26620, AT3G23640, AT3G46970	pfkB-type carbohydrate kinase family protein | chr4:6371377-6372770 REVERSE ||| beta-fructofuranosidase, putative / invertase, putative / saccharase, putative / beta-fructosidase, putative | chr5:7474810-7477941 REVERSE ||| Symbols: ATHXK2, HXK2 | HXK2 (HEXOKINASE 2); ATP binding / fructokinase/ glucokinase/ hexokinase | chr2:8570750-8574000 FORWARD ||| Symbols: HKL1 | HKL1 (HEXOKINASE-LIKE 1); A…
not assigned.no ontology.hydroxyproline rich proteins	7	26	2.3921	0.498943	AT1G63540, AT5G21280, AT3G29390, AT3G13990, AT1G04080, AT4G04980, AT3G45230	hydroxyproline-rich glycoprotein family protein | chr1:23566958-23569495 FORWARD ||| hydroxyproline-rich glycoprotein family protein | chr5:7263994-7265678 REVERSE ||| Symbols: RIK | RIK (RS2-Interacting KH protein); RNA binding | chr3:11289613-11294774 FORWARD ||| unknown protein | chr3:4625570-4630613 REVERSE ||| Symbols: PRP39 | PRP39; binding | chr1:1051343-1056751 FORWARD ||| FUNCTIONS IN: m…
RNA.regulation of transcription.Chromatin Remodeling Factors	7	24	2.67399	0.498943	AT1G61140, AT5G05130, AT1G21700, AT3G12810, AT3G06400, AT3G54280, AT3G20010	Symbols: EDA16 | EDA16 (embryo sac development arrest 16); ATP binding / DNA binding / helicase/ nucleic acid binding / protein binding / zinc ion binding | chr1:22534717-22540850 REVERSE ||| SNF2 domain-containing protein / helicase domain-containing protein / RING finger domain-containing protein | chr5:1512120-1515079 FORWARD ||| Symbols: ATSWI3C, CHB4 | ATSWI3C (SWITCH/SUCROSE NONFERMENTING 3…
RNA.regulation of transcription.AP2/EREBP, APETALA2/Ethylene-responsive element binding protein family	6	23	2.29099	0.498943	AT3G11020, AT2G40220, AT1G25560, AT5G18560, AT1G80580, AT1G63040, AT3G54390, AT3G14180, AT3G24860, AT4G26640, AT1G01510, AT5G06960, AT5G06950, AT2G17410, AT2G17390, AT3G16940	Symbols: DREB2B, DREB2 | DREB2B (DRE/CRT-BINDING PROTEIN 2B); DNA binding / transcription activator/ transcription factor | chr3:3455355-3457214 FORWARD ||| Symbols: ABI4, SUN6, SIS5, ISI3, GIN6, SAN5 | ABI4 (ABA INSENSITIVE 4); DNA binding / transcription factor | chr2:16796599-16797585 REVERSE ||| Symbols: TEM1 | TEM1 (TEMPRANILLO 1); transcription factor | chr1:8981677-8983041 REVERSE ||| Symb…
lipid metabolism.lipid degradation.beta-oxidation	5	20	2.16308	0.498943	AT4G14430, AT4G14440, AT4G00520, AT1G01710, AT4G29010	Symbols: IBR10, ATECI2, ECI2, ECHIB, PEC12 | IBR10 (INDOLE-3-BUTYRIC ACID RESPONSE 10); catalytic/ dodecenoyl-CoA delta-isomerase | chr4:8304600-8305705 REVERSE ||| Symbols: ATECI3, ECI3, HCD1 | HCD1 (3-HYDROXYACYL-COA DEHYDRATASE 1); carnitine racemase/ catalytic/ dodecenoyl-CoA delta-isomerase | chr4:8306745-8307753 REVERSE ||| acyl-CoA thioesterase family protein | chr4:227694-231699 FORWARD |…
protein.synthesis.transfer RNA.nucleus.tRNA-Pro	6	19	2.99663	0.498943	AT1G28870, AT1G28880, AT1G28850, AT1G28860, AT1G28890, AT1G28840	pre-tRNA | chr1:10099425-10099496 FORWARD ||| pre-tRNA | chr1:10099827-10099898 FORWARD ||| pre-tRNA | chr1:10098653-10098724 FORWARD ||| pre-tRNA | chr1:10099079-10099150 FORWARD ||| pre-tRNA | chr1:10100273-10100344 FORWARD ||| pre-tRNA | chr1:10097718-10097789 FORWARD
major CHO metabolism.degradation.sucrose	5	18	2.49613	0.498943	AT4G10260, AT5G22510, AT2G19860, AT1G50460, AT4G26620	pfkB-type carbohydrate kinase family protein | chr4:6371377-6372770 REVERSE ||| beta-fructofuranosidase, putative / invertase, putative / saccharase, putative / beta-fructosidase, putative | chr5:7474810-7477941 REVERSE ||| Symbols: ATHXK2, HXK2 | HXK2 (HEXOKINASE 2); ATP binding / fructokinase/ glucokinase/ hexokinase | chr2:8570750-8574000 FORWARD ||| Symbols: HKL1 | HKL1 (HEXOKINASE-LIKE 1); A…
minor CHO metabolism.others	5	18	2.49613	0.498943	AT1G19600, AT1G48430, AT5G57330, AT3G01590, AT1G04420	pfkB-type carbohydrate kinase family protein | chr1:6778988-6781173 FORWARD ||| dihydroxyacetone kinase family protein | chr1:17902636-17906806 REVERSE ||| aldose 1-epimerase family protein | chr5:23218214-23221089 FORWARD ||| aldose 1-epimerase family protein | chr3:226066-228623 FORWARD ||| aldo/keto reductase family protein | chr1:1191608-1193884 FORWARD
TCA / org. transformation.TCA	5	16	2.95034	0.498943	AT1G34430, AT2G05710, AT3G55410, AT5G66760, AT2G47510	Symbols: EMB3003 | EMB3003 (embryo defective 3003); acyltransferase/ dihydrolipoyllysine-residue acetyltransferase/ protein binding | chr1:12587752-12590192 REVERSE ||| aconitate hydratase, cytoplasmic, putative / citrate hydro-lyase/aconitase, putative | chr2:2141399-2146678 FORWARD ||| 2-oxoglutarate dehydrogenase E1 component, putative / oxoglutarate decarboxylase, putative / alpha-ketoglutari…
N-metabolism	5	16	2.95034	0.498943	AT1G37130, AT2G15620, AT2G41220, AT1G66200, AT1G51720	Symbols: NIA2, B29, NIA2-1, CHL3, NR, NR2, ATNR2 | NIA2 (NITRATE REDUCTASE 2); nitrate reductase (NADH)/ nitrate reductase | chr1:14158527-14161938 FORWARD ||| Symbols: NIR1, NIR, ATHNIR | NIR1 (NITRITE REDUCTASE 1); ferredoxin-nitrate reductase/ nitrite reductase (NO-forming) | chr2:6810476-6812939 FORWARD ||| Symbols: GLU2 | GLU2 (GLUTAMATE SYNTHASE 2); glutamate synthase (ferredoxin) | chr2:17…
cell wall.cellulose synthesis.cellulose synthase	5	15	3.24558	0.498943	AT1G23480, AT2G21770, AT5G44030, AT4G24010, AT5G05170	Symbols: ATCSLA03, CSLA03, ATCSLA3 | ATCSLA03 (CELLULOSE SYNTHASE-LIKE A3); cellulose synthase/ transferase, transferring glycosyl groups | chr1:8333020-8336385 FORWARD ||| Symbols: CESA9, CESA09 | CESA9 (CELLULOSE SYNTHASE A9); cellulose synthase/ transferase, transferring glycosyl groups | chr2:9284837-9289536 FORWARD ||| Symbols: CESA4, IRX5, NWS2 | CESA4 (CELLULOSE SYNTHASE A4); cellulose syn…
protein.degradation.ubiquitin.ubiquitin protease	5	15	3.24558	0.498943	AT5G06600, AT1G17110, AT3G14400, AT5G10790, AT4G17908	Symbols: UBP12 | UBP12 (UBIQUITIN-SPECIFIC PROTEASE 12); ubiquitin thiolesterase/ ubiquitin-specific protease | chr5:2019107-2027943 REVERSE ||| Symbols: UBP15 | UBP15 (UBIQUITIN-SPECIFIC PROTEASE 15); ubiquitin-specific protease | chr1:5845675-5850889 REVERSE ||| Symbols: UBP25 | UBP25 (UBIQUITIN-SPECIFIC PROTEASE 25); ubiquitin thiolesterase/ ubiquitin-specific protease | chr3:4811532-4815515 R…
misc.gluco-, galacto- and mannosidases.beta-galactosidase	4	14	2.59523	0.498943	AT5G63800, AT5G20710, AT2G32810, AT1G45130	Symbols: MUM2, BGAL6 | MUM2 (MUCILAGE-MODIFIED 2); beta-galactosidase | chr5:25530055-25535849 FORWARD ||| Symbols: BGAL7 | BGAL7 (beta-galactosidase 7); beta-galactosidase | chr5:7010522-7014249 FORWARD ||| Symbols: BGAL9 | BGAL9 (Beta galactosidase 9); beta-galactosidase/ catalytic/ cation binding / sugar binding | chr2:13919127-13925350 REVERSE ||| Symbols: BGAL5 | BGAL5 (beta-galactosidase 5)…
protein.targeting.secretory pathway.golgi	4	14	2.59523	0.498943	AT3G44340, AT4G01810, AT1G05520, AT3G27530	Symbols: CEF | CEF (clone eighty-four); protein binding / transporter/ zinc ion binding | chr3:16011621-16020254 REVERSE ||| protein transport protein-related | chr4:776488-780355 REVERSE ||| transport protein, putative | chr1:1630900-1635711 REVERSE ||| Symbols: GC6 | GC6 (golgin candidate 6); binding / protein transporter | chr3:10193569-10200013 REVERSE
protein.degradation.ubiquitin.E2	4	14	2.59523	0.498943	AT5G05080, AT2G02760, AT2G32790, AT2G33770	Symbols: UBC22 | UBC22 (ubiquitin-conjugating enzyme 22); ubiquitin-protein ligase | chr5:1498553-1500784 REVERSE ||| Symbols: ATUBC2, UBC2 | ATUBC2 (UBIQUITING-CONJUGATING ENZYME 2); ubiquitin-protein ligase | chr2:773684-775371 FORWARD ||| ubiquitin-conjugating enzyme, putative | chr2:13905488-13906326 REVERSE ||| Symbols: UBC24, ATUBC24, PHO2 | PHO2 (PHOSPHATE 2); ubiquitin-protein ligase | ch…
PS.calvin cyle	4	13	2.88392	0.498943	AT1G56190, AT3G04790, AT1G73110, AT4G20130	phosphoglycerate kinase, putative | chr1:21028238-21030649 FORWARD ||| ribose 5-phosphate isomerase-related | chr3:1313316-1315243 FORWARD ||| ribulose bisphosphate carboxylase/oxygenase activase, putative / RuBisCO activase, putative | chr1:27494121-27496878 REVERSE ||| Symbols: PTAC14 | PTAC14 (PLASTID TRANSCRIPTIONALLY ACTIVE14) | chr4:10878887-10881945 FORWARD
minor CHO metabolism.callose	4	13	2.88392	0.498943	AT3G07160, AT1G06490, AT3G59100, AT4G04970	Symbols: ATGSL10, gsl10 | ATGSL10 (glucan synthase-like 10); 1,3-beta-glucan synthase | chr3:2264945-2279383 REVERSE ||| Symbols: ATGSL07, gsl07, atgsl7 | ATGSL07 (glucan synthase-like 7); 1,3-beta-glucan synthase/ transferase, transferring glycosyl groups | chr1:1978762-1989046 FORWARD ||| Symbols: ATGSL11, gsl11 | ATGSL11 (glucan synthase-like 11); 1,3-beta-glucan synthase/ transferase, transfe…
hormone metabolism.gibberelin.synthesis-degradation	4	13	2.88392	0.498943	AT3G46500, AT1G52820, AT1G05160, AT1G44090	oxidoreductase, 2OG-Fe(II) oxygenase family protein | chr3:17120480-17122745 FORWARD ||| 2-oxoglutarate-dependent dioxygenase, putative | chr1:19669183-19670427 FORWARD ||| Symbols: CYP88A3, ATKAO1, KAO1 | CYP88A3 (CYTOCHROME P450 88 A3); ent-kaurenoate oxidase/ oxygen binding | chr1:1487378-1490947 REVERSE ||| Symbols: ATGA20OX5, GA2OX5 | ATGA20OX5 (ARABIDOPSIS THALIANA GIBBERELLIN 20-OXIDASE 5)…
signalling.receptor kinases.S-locus glycoprotein like	4	13	2.88392	0.498943	AT1G60987, AT1G61490, AT5G24080, AT3G12000	Symbols: SCRL5 | SCRL5 (SCR-Like 5) | chr1:22460377-22461164 FORWARD ||| S-locus protein kinase, putative | chr1:22685154-22688267 REVERSE ||| protein kinase family protein | chr5:8139253-8141122 REVERSE ||| S-locus related protein SLR1, putative (S1) | chr3:3818262-3819620 REVERSE
stress.biotic.receptors	4	12	3.24461	0.498943	AT5G45080, AT5G45250, AT1G64070, AT1G27170	Symbols: AtPP2-A6 | AtPP2-A6 (Phloem protein 2-A6); carbohydrate binding | chr5:18191575-18193207 REVERSE ||| Symbols: RPS4 | RPS4 (RESISTANT TO P. SYRINGAE 4); receptor | chr5:18321914-18326022 REVERSE ||| Symbols: RLM1 | RLM1 (RESISTANCE TO LEPTOSPHAERIA MACULANS 1); ATP binding / protein binding / transmembrane receptor | chr1:23779949-23783449 FORWARD ||| ATP binding / protein binding / trans…
RNA.regulation of transcription.JUMONJI family	4	12	3.24461	0.498943	AT3G48430, AT2G38950, AT1G78280, AT5G46910	Symbols: REF6 | REF6 (RELATIVE OF EARLY FLOWERING 6); nucleic acid binding / transcription factor/ zinc ion binding | chr3:17935609-17940746 FORWARD ||| transcription factor jumonji (jmj) family protein / zinc finger (C5HC2 type) family protein | chr2:16260853-16265219 FORWARD ||| transferase, transferring glycosyl groups | chr1:29452555-29457373 FORWARD ||| transcription factor jumonji (jmj) fam…
hormone metabolism.salicylic acid.synthesis-degradation	4	11	3.708	0.498943	AT2G14060, AT5G38020, AT3G21950, AT5G37970	S-adenosyl-L-methionine:carboxyl methyltransferase family protein | chr2:5914445-5915767 REVERSE ||| S-adenosyl-L-methionine:carboxyl methyltransferase family protein | chr5:15165652-15167729 REVERSE ||| methyltransferase | chr3:7734396-7736394 FORWARD ||| S-adenosyl-L-methionine:carboxyl methyltransferase family protein | chr5:15123089-15124684 REVERSE
hormone metabolism.salicylic acid	4	11	3.708	0.498943	AT2G14060, AT5G38020, AT3G21950, AT5G37970	S-adenosyl-L-methionine:carboxyl methyltransferase family protein | chr2:5914445-5915767 REVERSE ||| S-adenosyl-L-methionine:carboxyl methyltransferase family protein | chr5:15165652-15167729 REVERSE ||| methyltransferase | chr3:7734396-7736394 FORWARD ||| S-adenosyl-L-methionine:carboxyl methyltransferase family protein | chr5:15123089-15124684 REVERSE
transport.unspecified anions	4	10	4.32688	0.498943	AT5G49890, AT3G06450, AT1G55620, AT1G01910	Symbols: CLC-C, ATCLC-C | CLC-C (CHLORIDE CHANNEL C); anion channel/ voltage-gated chloride channel | chr5:20288119-20292350 REVERSE ||| anion exchange family protein | chr3:1975959-1980036 REVERSE ||| Symbols: CLC-F, ATCLC-F | CLC-F (CHLORIDE CHANNEL F); ion channel/ voltage-gated chloride channel | chr1:20787134-20791189 REVERSE ||| anion-transporting ATPase, putative | chr1:313215-315902 REVER…
mitochondrial electron transport / ATP synthesis	12	64	1.4984	0.509257	AT1G19580, AT1G47260, AT1G16700, AT2G29990, AT1G32350, AT5G40810, AT1G15220, AT3G08950, AT5G08670, AT2G21870, AT5G47030, AT4G01660	Symbols: GAMMA CA1 | GAMMA CA1 (GAMMA CARBONIC ANHYDRASE 1); carbonate dehydratase | chr1:6774763-6777456 FORWARD ||| Symbols: APFI, GAMMA CA2 | GAMMA CA2 (GAMMA CARBONIC ANHYDRASE 2); carbonate dehydratase | chr1:17321173-17323484 REVERSE ||| NADH-ubiquinone oxidoreductase 23 kDa subunit, mitochondrial, putative | chr1:5709725-5711902 FORWARD ||| Symbols: NDA2 | NDA2 (ALTERNATIVE NAD(P)H DEHYDRO…
mitochondrial electron transport / ATP synthesis.F1-ATPase	3	10	2.7801	0.509257	AT5G08670, AT2G21870, AT5G47030, AT4G01660	ATP binding / hydrogen ion transporting ATP synthase, rotational mechanism | chr5:2818117-2821176 REVERSE ||| unknown protein | chr2:9320195-9322734 REVERSE ||| ATP synthase delta chain, mitochondrial | chr5:19090298-19092314 FORWARD ||| Symbols: ATABC1, ATATH10 | ATABC1 (ARABIDOPSIS THALIANA ABC TRANSPORTER 1); transporter | chr4:708544-711256 FORWARD
protein.postranslational modification	59	386	1.17395	0.532425	AT1G30270, AT2G39840, AT2G23070, AT5G27840, AT3G59830, AT2G35510, AT1G66700, AT2G19400, AT1G63500, AT5G10480, AT3G48260, AT4G26610, AT1G74330, AT4G17480, AT1G68410, AT4G23660, AT1G30640, AT3G25840, AT4G17470, AT2G30020, AT1G57700, AT2G23080, AT5G22840, AT1G16270, AT1G01450, AT4G03960, AT2G31320, AT1G61610, AT3G14370, AT5G40540, AT1G49580, AT1G79630, AT1G08750, AT3G50730, AT5G35796, AT3G45240, AT3…	Symbols: CIPK23, SnRK3.23, ATCIPK23, LKS1 | CIPK23 (CBL-INTERACTING PROTEIN KINASE 23); kinase/ protein binding / protein serine/threonine kinase | chr1:10654857-10658897 FORWARD ||| Symbols: TOPP4 | TOPP4; protein serine/threonine phosphatase | chr2:16627258-16629289 FORWARD ||| casein kinase II alpha chain, putative | chr2:9823965-9826898 REVERSE ||| Symbols: TOPP8 | TOPP8; protein serine/threo…
misc.gluco-, galacto- and mannosidases	10	52	1.54565	0.532425	AT5G36890, AT1G67490, AT1G61810, AT3G23640, AT5G63800, AT5G20710, AT2G32810, AT1G45130, AT5G13980, AT3G26140, AT4G14890	Symbols: BGLU42 | BGLU42 (BETA GLUCOSIDASE 42); beta-glucosidase/ catalytic/ cation binding / hydrolase, hydrolyzing O-glycosyl compounds | chr5:14542026-14546230 REVERSE ||| Symbols: GCS1, KNF | GCS1 (GLUCOSIDASE 1); alpha-glucosidase | chr1:25280451-25286596 REVERSE ||| Symbols: BGLU45 | BGLU45 (BETA-GLUCOSIDASE 45); catalytic/ cation binding / hydrolase, hydrolyzing O-glycosyl compounds | chr1…
protein.aa activation	10	52	1.54565	0.532425	AT1G28350, AT5G26830, AT2G04842, AT4G04350, AT4G10320, AT1G27160, AT4G39280, AT3G46100, AT5G03406, AT1G78910	ATP binding / aminoacyl-tRNA ligase/ nucleotide binding / tyrosine-tRNA ligase | chr1:9944036-9949800 FORWARD ||| threonyl-tRNA synthetase / threonine--tRNA ligase (THRRS) | chr5:9437297-9441779 FORWARD ||| Symbols: EMB2761 | EMB2761 (EMBRYO DEFECTIVE 2761); ATP binding / aminoacyl-tRNA ligase/ ligase, forming aminoacyl-tRNA and related compounds / nucleotide binding / threonine-tRNA ligase | chr…
amino acid metabolism.synthesis	16	91	1.38547	0.537541	AT5G11520, AT2G38400, AT3G55610, AT2G37500, AT2G36880, AT4G01850, AT3G63250, AT2G43910, AT5G49810, AT5G52100, AT4G33680, AT5G21060, AT1G18640, AT3G29200, AT2G04400, AT1G71920	Symbols: ASP3, YLS4 | ASP3 (ASPARTATE AMINOTRANSFERASE 3); L-aspartate:2-oxoglutarate aminotransferase | chr5:3685089-3687764 REVERSE ||| Symbols: AGT3 | AGT3 (ALANINE:GLYOXYLATE AMINOTRANSFERASE 3); alanine-glyoxylate transaminase/ catalytic/ pyridoxal phosphate binding / transaminase | chr2:16083689-16086349 FORWARD ||| Symbols: P5CS2 | P5CS2 (DELTA 1-PYRROLINE-5-CARBOXYLATE SYNTHASE 2); cataly…
protein.targeting	23	138	1.29937	0.544287	AT5G48650, AT3G59020, AT2G03640, AT2G31660, AT1G02690, AT5G17020, AT1G14850, AT2G36070, AT3G04800, AT5G03940, AT3G44340, AT4G01810, AT1G05520, AT3G27530, AT3G51310, AT5G53530, AT2G05170, AT2G38020, AT1G78720, AT1G48240, AT5G08470, AT5G56290, AT4G12060	nuclear transport factor 2 (NTF2) family protein / RNA recognition motif (RRM)-containing protein | chr5:19726733-19729654 FORWARD ||| binding / protein transporter | chr3:21810260-21817555 REVERSE ||| nuclear transport factor 2 (NTF2) family protein / RNA recognition motif (RRM)-containing protein | chr2:1104307-1106791 REVERSE ||| Symbols: SAD2, URM9 | SAD2 (SUPER SENSITIVE TO ABA AND DROUGHT2)…
secondary metabolism.isoprenoids.terpenoids	4	16	2.16258	0.544371	AT1G48820, AT5G48110, AT5G36150, AT4G15870	terpene synthase/cyclase family protein | chr1:18055229-18059367 FORWARD ||| terpene synthase/cyclase family protein | chr5:19501157-19504357 REVERSE ||| Symbols: ATPEN3 | ATPEN3 (putative pentacyclic triterpene synthase 3); catalytic/ lupeol synthase | chr5:14220737-14225422 REVERSE ||| Symbols: ATTS1 | ATTS1; lyase/ magnesium ion binding | chr4:9008372-9010947 REVERSE
protein.targeting.secretory pathway.vacuole	4	16	2.16258	0.544371	AT3G51310, AT5G53530, AT2G05170, AT2G38020	Symbols: VPS35C | VPS35C (VPS35 HOMOLOG C) | chr3:19044480-19049382 REVERSE ||| Symbols: VPS26A | VPS26A (VACUOLAR PROTEIN SORTING 26A) | chr5:21746035-21748595 REVERSE ||| Symbols: ATVPS11 | ATVPS11; binding / protein binding / transporter/ zinc ion binding | chr2:1869877-1873812 FORWARD ||| Symbols: VCL1, MAN, EMB258 | VCL1 (VACUOLELESS 1) | chr2:15909908-15914710 REVERSE
protein.degradation.ubiquitin.E3.SCF.FBOX	53	357	1.13311	0.545453	AT5G02930, AT2G44130, AT5G38393, AT3G48880, AT3G17620, AT1G66290, AT3G20690, AT4G02740, AT5G56380, AT3G56890, AT5G02700, AT3G10240, AT1G78280, AT2G26860, AT5G07670, AT2G42620, AT3G23950, AT3G42722, AT5G02920, AT4G13060, AT5G51380, AT4G22170, AT2G04840, AT4G15475, AT1G55000, AT1G27420, AT5G38390, AT1G19160, AT4G05010, AT3G25550, AT3G17320, AT1G77000, AT1G12490, AT1G51550, AT5G22610, AT5G41840, AT3…	F-box family protein | chr5:682577-684480 FORWARD ||| kelch repeat-containing F-box family protein | chr2:18253610-18255054 FORWARD ||| pseudogene, F-box protein family, similar to F-box protein family | chr5:15368228-15372475 FORWARD ||| F-box family protein | chr3:18126962-18129189 FORWARD ||| F-box family protein | chr3:6026446-6027694 REVERSE ||| F-box family protein | chr1:24713306-24714843 …
RNA.processing	32	203	1.21598	0.545453	AT4G31200, AT5G55100, AT1G60170, AT1G09760, AT5G51660, AT2G17580, AT5G20040, AT3G13300, AT1G30590, AT4G02840, AT3G01150, AT2G47990, AT5G14580, AT1G17760, AT2G36660, AT1G80070, AT1G10320, AT2G33340, AT1G03140, AT4G14342, AT1G54080, AT3G13570, AT5G61140, AT2G35340, AT4G18465, AT3G62310, AT2G25100, AT1G60080, AT5G02250, AT3G20420, AT3G04480, AT5G25800	SWAP (Suppressor-of-White-APricot)/surp domain-containing protein | chr4:15161636-15164914 REVERSE ||| SWAP (Suppressor-of-White-APricot)/surp domain-containing protein | chr5:22361159-22364780 REVERSE ||| Symbols: emb1220 | emb1220 (embryo defective 1220) | chr1:22192773-22195400 FORWARD ||| Symbols: U2A | U2A (U2 small nuclear ribonucleoprotein A); protein binding | chr1:3159125-3161692 REVERSE…
not assigned.no ontology.DC1 domain containing protein	13	74	1.38355	0.545453	AT3G27480, AT3G11370, AT4G10370, AT2G02700, AT4G11540, AT5G02330, AT5G37620, AT2G44400, AT1G55700, AT2G44390, AT1G55380, AT3G13590, AT4G01925	DC1 domain-containing protein | chr3:10173640-10175555 REVERSE ||| DC1 domain-containing protein | chr3:3561099-3562880 FORWARD ||| DC1 domain-containing protein | chr4:6423577-6425661 REVERSE ||| DC1 domain-containing protein | chr2:756443-757942 FORWARD ||| DC1 domain-containing protein | chr4:6990978-6992555 REVERSE ||| DC1 domain-containing protein | chr5:487272-489242 REVERSE ||| DC1 domain-…
lipid metabolism.lipid degradation	11	65	1.32192	0.545453	AT5G24210, AT4G16070, AT4G13550, AT1G31480, AT1G52570, AT5G55480, AT4G14430, AT4G14440, AT4G00520, AT1G01710, AT4G29010	lipase class 3 family protein | chr5:8217335-8219619 FORWARD ||| lipase class 3 family protein | chr4:9096730-9100841 REVERSE ||| triacylglycerol lipase | chr4:7871057-7876963 REVERSE ||| Symbols: SGR2 | SGR2 (SHOOT GRAVITROPISM 2); phospholipase A1 | chr1:11265880-11271701 FORWARD ||| Symbols: PLDALPHA2 | PLDALPHA2 (phosphlipase d alpha 2); phospholipase D | chr1:19583940-19586551 REVERSE ||| Sy…
hormone metabolism.auxin	9	50	1.42451	0.545453	AT1G51780, AT5G35570, AT1G05180, AT3G02260, AT1G48660, AT1G29490, AT2G33310, AT2G34680, AT5G64600	Symbols: ILL5 | ILL5; IAA-amino acid conjugate hydrolase/ metallopeptidase | chr1:19204512-19206586 FORWARD ||| unknown protein | chr5:13749711-13753458 REVERSE ||| Symbols: AXR1 | AXR1 (AUXIN RESISTANT 1); small protein activating enzyme | chr1:1498114-1501824 REVERSE ||| Symbols: BIG, DOC1, TIR3, UMB1, ASA1, LPR1, CRM1 | BIG (BIG); binding / ubiquitin-protein ligase/ zinc ion binding | chr3:430…
lipid metabolism.FA synthesis and FA elongation	9	49	1.46021	0.545453	AT1G36160, AT1G36180, AT1G62640, AT1G74960, AT1G47780, AT4G13050, AT1G30520, AT5G36880, AT5G27200	Symbols: ACC1, AT-ACC1, EMB22, GK, PAS3 | ACC1 (ACETYL-COENZYME A CARBOXYLASE 1); acetyl-CoA carboxylase | chr1:13534165-13544008 FORWARD ||| Symbols: ACC2 | ACC2 (ACETYL-COA CARBOXYLASE 2); acetyl-CoA carboxylase | chr1:13545972-13558492 FORWARD ||| Symbols: KAS III | KAS III (3-KETOACYL-ACYL CARRIER PROTEIN SYNTHASE III); 3-oxoacyl-[acyl-carrier-protein] synthase/ catalytic/ transferase, transf…
protein.degradation.serine protease	9	49	1.46021	0.545453	AT4G20850, AT5G47040, AT5G54745, AT5G26860, AT2G22980, AT5G22980, AT2G25240, AT3G63470, AT1G66670	Symbols: TPP2 | TPP2 (TRIPEPTIDYL PEPTIDASE II); tripeptidyl-peptidase | chr4:11160721-11169889 REVERSE ||| Symbols: LON2 | LON2 (LON PROTEASE 2); ATP binding / ATP-dependent peptidase/ nucleoside-triphosphatase/ nucleotide binding / serine-type endopeptidase/ serine-type peptidase | chr5:19093152-19098715 REVERSE ||| DegP protease family | chr5:22240256-22241233 REVERSE ||| Symbols: LON_ARA_ARA,…
protein.targeting.nucleus	7	35	1.62234	0.545453	AT5G48650, AT3G59020, AT2G03640, AT2G31660, AT1G02690, AT5G17020, AT1G14850	nuclear transport factor 2 (NTF2) family protein / RNA recognition motif (RRM)-containing protein | chr5:19726733-19729654 FORWARD ||| binding / protein transporter | chr3:21810260-21817555 REVERSE ||| nuclear transport factor 2 (NTF2) family protein / RNA recognition motif (RRM)-containing protein | chr2:1104307-1106791 REVERSE ||| Symbols: SAD2, URM9 | SAD2 (SUPER SENSITIVE TO ABA AND DROUGHT2)…
transporter.sugars	6	32	1.4971	0.545453	AT2G20780, AT1G54730, AT5G17010, AT2G22730, AT1G21070, AT3G03090, AT4G03560, AT4G01010, AT5G53130	mannitol transporter, putative | chr2:8947242-8949413 REVERSE ||| sugar transporter, putative | chr1:20424471-20430051 FORWARD ||| sugar transporter family protein | chr5:5587351-5592446 REVERSE ||| transporter-related | chr2:9660964-9664133 FORWARD ||| transporter-related | chr1:7375869-7378147 REVERSE ||| Symbols: AtVGT1 | AtVGT1 (Arabidopsis thaliana vacuolar glucose transporter 1); carbohydra…
TCA / org. transformation	6	31	1.55709	0.545453	AT1G34430, AT2G05710, AT3G55410, AT5G66760, AT2G47510, AT2G13560	Symbols: EMB3003 | EMB3003 (embryo defective 3003); acyltransferase/ dihydrolipoyllysine-residue acetyltransferase/ protein binding | chr1:12587752-12590192 REVERSE ||| aconitate hydratase, cytoplasmic, putative / citrate hydro-lyase/aconitase, putative | chr2:2141399-2146678 FORWARD ||| 2-oxoglutarate dehydrogenase E1 component, putative / oxoglutarate decarboxylase, putative / alpha-ketoglutari…
RNA.processing.ribonucleases	6	31	1.55709	0.545453	AT2G25100, AT1G60080, AT5G02250, AT3G20420, AT3G04480, AT5G25800	ribonuclease HII family protein | chr2:10679524-10681998 REVERSE ||| 3 exoribonuclease family domain 1-containing protein | chr1:22152230-22154589 REVERSE ||| Symbols: EMB2730, RNR1, ATMTRNASEII | EMB2730 (EMBRYO DEFECTIVE 2730); 3-5-exoribonuclease/ RNA binding / ribonuclease | chr5:454783-459527 FORWARD ||| Symbols: RTL2, ATRTL2 | RTL2 (RNASE THREE-LIKE PROTEIN 2); double-stranded RNA binding /…
transport.metabolite transporters at the mitochondrial membrane	6	31	1.55709	0.545453	AT1G79900, AT1G12480, AT5G48970, AT5G26200, AT5G17400, AT5G24030, AT1G71870, AT4G36790, AT3G03620, AT4G39180, AT3G62770, AT4G39170, AT1G15180, AT5G54750, AT1G75370, AT1G72560, AT1G17500, AT2G26510	Symbols: ATMBAC2, BAC2 | BAC2; L-ornithine transmembrane transporter/ binding / carnitine:acyl carnitine antiporter | chr1:30052297-30053936 REVERSE ||| Symbols: OZS1, SLAC1, RCD3, CDI3 | OZS1 (OZONE-SENSITIVE 1); transporter | chr1:4257268-4259300 REVERSE ||| mitochondrial substrate carrier family protein | chr5:19856830-19859763 REVERSE ||| mitochondrial substrate carrier family protein | chr5:…
not assigned.no ontology.proline rich family	6	31	1.55709	0.545453	AT4G18570, AT3G09000, AT5G07020, AT5G19810, AT3G51290, AT3G50580	proline-rich family protein | chr4:10231218-10234693 FORWARD ||| proline-rich family protein | chr3:2745644-2748459 FORWARD ||| proline-rich family protein | chr5:2180502-2182418 REVERSE ||| proline-rich extensin-like family protein | chr5:6693052-6693801 FORWARD ||| proline-rich family protein | chr3:19039980-19042569 FORWARD ||| unknown protein | chr3:18768631-18769519 REVERSE
hormone metabolism.ethylene	6	29	1.6927	0.545453	AT4G11280, AT4G08040, AT2G22810, AT3G23240, AT2G44840, AT1G66340	Symbols: ACS6 | ACS6 (1-AMINOCYCLOPROPANE-1-CARBOXYLIC ACID (ACC) SYNTHASE 6); 1-aminocyclopropane-1-carboxylate synthase | chr4:6864097-6866116 FORWARD ||| Symbols: ACS11 | ACS11; 1-aminocyclopropane-1-carboxylate synthase | chr4:4887112-4888939 FORWARD ||| Symbols: ACS4, ACC4, ATACS4 | ACS4 (1-AMINOCYCLOPROPANE-1-CARBOXYLATE SYNTHASE 4); 1-aminocyclopropane-1-carboxylate synthase | chr2:9717791…
not assigned.no ontology.C2 domain-containing protein	5	24	1.70726	0.545453	AT1G48090, AT3G57880, AT4G17140, AT1G22610, AT3G62780	phosphoinositide binding | chr1:17732010-17757970 REVERSE ||| C2 domain-containing protein | chr3:21430983-21434600 REVERSE ||| FUNCTIONS IN: molecular_function unknown; INVOLVED IN: biological_process unknown; EXPRESSED IN: 23 plant structures; EXPRESSED DURING: 13 growth stages; CONTAINS InterPro DOMAIN/s: Pleckstrin homology (InterPro:IPR001849); BEST Arabidopsis thaliana protein match is: pho…
lipid metabolism.Phospholipid synthesis	5	22	1.90827	0.545453	AT1G51260, AT3G18850, AT5G58560, AT4G16700, AT4G25970	Symbols: LPAT3 | LPAT3; 1-acylglycerol-3-phosphate O-acyltransferase | chr1:19003376-19005641 REVERSE ||| Symbols: LPAT5 | LPAT5; acyltransferase | chr3:6499415-6501359 REVERSE ||| phosphatidate cytidylyltransferase family protein | chr5:23670395-23672877 FORWARD ||| Symbols: PSD1 | PSD1 (phosphatidylserine decarboxylase 1); phosphatidylserine decarboxylase | chr4:9395636-9398308 REVERSE ||| Symb…
hormone metabolism.gibberelin	5	22	1.90827	0.545453	AT3G46500, AT1G52820, AT1G05160, AT1G44090, AT3G11540	oxidoreductase, 2OG-Fe(II) oxygenase family protein | chr3:17120480-17122745 FORWARD ||| 2-oxoglutarate-dependent dioxygenase, putative | chr1:19669183-19670427 FORWARD ||| Symbols: CYP88A3, ATKAO1, KAO1 | CYP88A3 (CYTOCHROME P450 88 A3); ent-kaurenoate oxidase/ oxygen binding | chr1:1487378-1490947 REVERSE ||| Symbols: ATGA20OX5, GA2OX5 | ATGA20OX5 (ARABIDOPSIS THALIANA GIBBERELLIN 20-OXIDASE 5)…
protein.degradation.aspartate protease	4	18	1.85339	0.545453	AT1G03220, AT3G20015, AT5G36260, AT1G01300	extracellular dermal glycoprotein, putative / EDGP, putative | chr1:787122-788651 FORWARD ||| aspartic-type endopeptidase | chr3:6978477-6980368 REVERSE ||| aspartyl protease family protein | chr5:14284955-14288333 REVERSE ||| aspartyl protease family protein | chr1:116943-118764 FORWARD
not assigned.no ontology.armadillo/beta-catenin repeat family protein	4	17	1.99616	0.545453	AT1G44120, AT5G19330, AT5G66200, AT5G37290	C2 domain-containing protein / armadillo/beta-catenin repeat family protein | chr1:16780610-16787414 FORWARD ||| armadillo/beta-catenin repeat family protein / BTB/POZ domain-containing protein | chr5:6507794-6512758 REVERSE ||| Symbols: ARO2 | ARO2 (ARMADILLO REPEAT ONLY 2); binding | chr5:26453460-26455822 REVERSE ||| armadillo/beta-catenin repeat family protein | chr5:14762370-14764344 FORWARD
hormone metabolism.ethylene.signal transduction	3	13	1.94584	0.545453	AT3G23240, AT2G44840, AT1G66340	Symbols: ERF1, ATERF1 | ERF1 (ETHYLENE RESPONSE FACTOR 1); DNA binding / transcription activator/ transcription factor | chr3:8295644-8296604 FORWARD ||| Symbols: ATERF13, EREBP, ERF13 | ERF13 (ETHYLENE-RESPONSIVE ELEMENT BINDING FACTOR 13); DNA binding / transcription factor | chr2:18495341-18496272 FORWARD ||| Symbols: ETR1, EIN1, ETR | ETR1 (ETHYLENE RESPONSE 1); ethylene binding / protein his…
hormone metabolism.ethylene.synthesis-degradation	3	13	1.94584	0.545453	AT4G11280, AT4G08040, AT2G22810	Symbols: ACS6 | ACS6 (1-AMINOCYCLOPROPANE-1-CARBOXYLIC ACID (ACC) SYNTHASE 6); 1-aminocyclopropane-1-carboxylate synthase | chr4:6864097-6866116 FORWARD ||| Symbols: ACS11 | ACS11; 1-aminocyclopropane-1-carboxylate synthase | chr4:4887112-4888939 FORWARD ||| Symbols: ACS4, ACC4, ATACS4 | ACS4 (1-AMINOCYCLOPROPANE-1-CARBOXYLATE SYNTHASE 4); 1-aminocyclopropane-1-carboxylate synthase | chr2:9717791…
misc.GCN5-related N-acetyltransferase	3	13	1.94584	0.545453	AT5G16800, AT4G37670, AT2G30330	GCN5-related N-acetyltransferase (GNAT) family protein | chr5:5524314-5526589 REVERSE ||| GCN5-related N-acetyltransferase (GNAT) family protein / amino acid kinase family protein | chr4:17696059-17698843 REVERSE ||| GCN5L1 family protein | chr2:12928767-12929737 REVERSE
DNA.synthesis/chromatin structure.histone	3	13	1.94584	0.545453	AT3G20670, AT1G52740, AT5G27670	Symbols: HTA13 | HTA13; DNA binding | chr3:7229407-7230146 FORWARD ||| Symbols: HTA9 | HTA9 (HISTONE H2A PROTEIN 9); DNA binding | chr1:19645268-19646482 FORWARD ||| Symbols: HTA7 | HTA7 (HISTONE H2A 7); DNA binding | chr5:9792561-9793456 REVERSE
minor CHO metabolism.myo-inositol	3	12	2.16207	0.545453	AT4G18010, AT5G61760, AT1G05630	Symbols: IP5PII, AT5PTASE2 | AT5PTASE2 (MYO-INOSITOL POLYPHOSPHATE 5-PHOSPHATASE 2); inositol-polyphosphate 5-phosphatase | chr4:9991012-9994420 REVERSE ||| Symbols: ATIPK2BETA, IPK2B, IPK2BETA | ATIPK2BETA; inositol or phosphatidylinositol kinase/ inositol trisphosphate 6-kinase | chr5:24813729-24815443 REVERSE ||| Symbols: AT5PTASE13, 5PTASE13 | 5PTASE13; inositol or phosphatidylinositol phosph…
lipid metabolism.lipid degradation.lipases.triacylglycerol lipase	3	12	2.16207	0.545453	AT5G24210, AT4G16070, AT4G13550	lipase class 3 family protein | chr5:8217335-8219619 FORWARD ||| lipase class 3 family protein | chr4:9096730-9100841 REVERSE ||| triacylglycerol lipase | chr4:7871057-7876963 REVERSE
secondary metabolism.phenylpropanoids.lignin biosynthesis	3	12	2.16207	0.545453	AT3G50740, AT2G30490, AT4G36220	Symbols: UGT72E1 | UGT72E1 (UDP-glucosyl transferase 72E1); UDP-glycosyltransferase/ coniferyl-alcohol glucosyltransferase/ transferase, transferring glycosyl groups | chr3:18855161-18856884 REVERSE ||| Symbols: ATC4H, C4H, CYP73A5 | C4H (CINNAMATE-4-HYDROXYLASE); trans-cinnamate 4-monooxygenase | chr2:12993663-12995770 REVERSE ||| Symbols: FAH1, CYP84A1 | FAH1 (FERULIC ACID 5-HYDROXYLASE 1); fer…
stress.biotic.signalling	3	12	2.16207	0.545453	AT4G37460, AT2G17430, AT2G17480	Symbols: SRFR1 | SRFR1 (SUPPRESSOR OF RPS4-RLD 1); protein complex scaffold | chr4:17608378-17615776 REVERSE ||| Symbols: ATMLO7, MLO7 | MLO7 (MILDEW RESISTANCE LOCUS O 7); calmodulin binding | chr2:7568018-7570840 FORWARD ||| Symbols: MLO8, ATMLO8 | MLO8 (MILDEW RESISTANCE LOCUS O 8); calmodulin binding | chr2:7590295-7594090 REVERSE
misc.misc2	3	12	2.16207	0.545453	AT2G26750, AT1G13560, AT1G35420, AT1G50560, AT4G07031, AT4G15360, AT3G28740, AT2G05870, AT1G64900, AT1G50550, AT5G57260, AT4G12320, AT5G36140, AT3G26210, AT1G65340, AT5G42580, AT3G26270, AT5G47990, AT3G20080, AT3G48290, AT5G44620, AT2G23220, AT3G26310, AT1G66540, AT3G26320, AT1G55940, AT1G33730, AT1G64710, AT5G14130, AT3G17070, AT1G34330, AT5G40150, AT2G39920, AT3G50920, AT1G52940, AT5G46410, AT2…	epoxide hydrolase, putative | chr2:11395896-11397092 REVERSE ||| Symbols: AAPT1, ATAAPT1 | AAPT1 (AMINOALCOHOLPHOSPHOTRANSFERASE 1); phosphatidyltransferase/ phosphotransferase, for other substituted phosphate groups | chr1:4638514-4642104 REVERSE ||| dienelactone hydrolase family protein | chr1:13026289-13027667 FORWARD ||| Symbols: CYP705A25 | CYP705A25; electron carrier/ heme binding / iron io…
misc.O-methyl transferases	3	12	2.16207	0.545453	AT4G16570, AT1G51990, AT1G21120	Symbols: ATPRMT7, PRMT7 | PRMT7 (PROTEIN ARGININE METHYLTRANSFERASE 7); methyltransferase | chr4:9336703-9340869 FORWARD ||| O-methyltransferase family 2 protein | chr1:19330949-19332667 FORWARD ||| O-methyltransferase, putative | chr1:7395228-7396773 REVERSE
RNA.regulation of transcription.Trihelix, Triple-Helix transcription factor family	3	12	2.16207	0.545453	AT3G54390, AT3G14180, AT3G24860	transcription factor | chr3:20137741-20139142 REVERSE ||| transcription factor | chr3:4707113-4708848 REVERSE ||| hydroxyproline-rich glycoprotein family protein | chr3:9073623-9074682 FORWARD
protein.degradation.autophagy	3	12	2.16207	0.545453	AT4G21980, AT1G03380, AT2G44140	Symbols: APG8A, ATG8A | APG8A (AUTOPHAGY 8A); APG8 activating enzyme/ APG8-specific protease/ Atg8 ligase | chr4:11655613-11657034 FORWARD ||| Symbols: ATATG18G | AtATG18g | chr1:835785-840940 FORWARD ||| autophagy 4a (APG4a) | chr2:18253497-18258035 REVERSE
development.squamosa promoter binding like (SPL)	3	12	2.16207	0.545453	AT1G15270, AT1G69170, AT1G02065, AT1G50030	FUNCTIONS IN: molecular_function unknown; INVOLVED IN: biological_process unknown; LOCATED IN: plasma membrane; EXPRESSED IN: 24 plant structures; EXPRESSED DURING: 15 growth stages; CONTAINS InterPro DOMAIN/s: Translation machinery associated TMA7 (InterPro:IPR015157); BEST Arabidopsis thaliana protein match is: unknown protein (TAIR:AT3G16040.1); Has 263 Blast hits to 263 proteins in 90 species…
protein.degradation.ubiquitin.E3.SCF	54	369	1.11382	0.55517	AT5G02930, AT2G44130, AT5G38393, AT3G48880, AT3G17620, AT1G66290, AT3G20690, AT4G02740, AT5G56380, AT3G56890, AT5G02700, AT3G10240, AT1G78280, AT2G26860, AT5G07670, AT2G42620, AT3G23950, AT3G42722, AT5G02920, AT4G13060, AT5G51380, AT4G22170, AT2G04840, AT4G15475, AT1G55000, AT1G27420, AT5G38390, AT1G19160, AT4G05010, AT3G25550, AT3G17320, AT1G77000, AT1G12490, AT1G51550, AT5G22610, AT5G41840, AT3…	F-box family protein | chr5:682577-684480 FORWARD ||| kelch repeat-containing F-box family protein | chr2:18253610-18255054 FORWARD ||| pseudogene, F-box protein family, similar to F-box protein family | chr5:15368228-15372475 FORWARD ||| F-box family protein | chr3:18126962-18129189 FORWARD ||| F-box family protein | chr3:6026446-6027694 REVERSE ||| F-box family protein | chr1:24713306-24714843 …
RNA.RNA binding	16	100	1.23629	0.557782	AT3G49390, AT1G03457, AT5G10800, AT1G29400, AT1G66260, AT2G26695, AT5G53680, AT2G37220, AT2G22090, AT5G61030, AT1G51510, AT4G28990, AT2G16940, AT3G54770, AT4G24270, AT4G10610	Symbols: CID10 | CID10; RNA binding / protein binding | chr3:18314562-18317998 REVERSE ||| RNA-binding protein, putative | chr1:860788-864075 REVERSE ||| RNA recognition motif (RRM)-containing protein | chr5:3412654-3418382 REVERSE ||| Symbols: AML5 | AML5 (ARABIDOPSIS MEI2-LIKE PROTEIN 5); RNA binding / nucleic acid binding / nucleotide binding | chr1:10290040-10294478 REVERSE ||| RNA and export…
cell.organisation	33	220	1.14594	0.568804	AT3G10220, AT5G54280, AT2G34560, AT2G01910, AT3G55005, AT2G04740, AT3G63480, AT2G04750, AT4G14365, AT1G47750, AT1G62050, AT5G60930, AT4G03505, AT2G41740, AT4G25590, AT2G20290, AT5G37590, AT5G65274, AT1G51405, AT5G27000, AT2G21380, AT1G04160, AT5G62250, AT5G54610, AT2G38440, AT1G63640, AT5G65930, AT5G54620, AT5G20470, AT5G54710, AT3G61710, AT4G14150, AT5G43900	tubulin folding cofactor B | chr3:3161757-3164231 FORWARD ||| Symbols: ATM2, ATMYOS1, ATM4 | ATM2 (ARABIDOPSIS THALIANA MYOSIN 2); motor | chr5:22039389-22046298 REVERSE ||| katanin, putative | chr2:14560188-14562950 FORWARD ||| Symbols: ATMAP65-6, MAP65-6 | ATMAP65-6; microtubule binding | chr2:416911-420587 FORWARD ||| Symbols: TON1B | TON1B (tonneau 1b) | chr3:20383956-20386382 FORWARD ||| ank…
protein.degradation.ubiquitin.proteasom	6	33	1.44156	0.587177	AT2G05840, AT5G43010, AT1G45000, AT5G05780, AT1G47250, AT5G42790	Symbols: PAA2 | PAA2 (20S PROTEASOME SUBUNIT PAA2); endopeptidase/ peptidase/ threonine-type endopeptidase | chr2:2234092-2236294 FORWARD ||| Symbols: RPT4A | RPT4A; ATPase | chr5:17248290-17251134 REVERSE ||| 26S proteasome regulatory complex subunit p42D, putative | chr1:17009141-17011886 FORWARD ||| Symbols: RPN8A, AE3, ATHMOV34 | RPN8A (RP NON-ATPASE SUBUNIT 8A) | chr5:1735730-1738492 FORWARD…
protein.degradation.subtilases	4	20	1.62153	0.587177	AT1G01900, AT4G15040, AT1G30600, AT3G14240, AT1G64470, AT2G46500, AT1G04850, AT1G53950, AT5G15400, AT2G24640, AT5G50430, AT1G19270, AT1G65130, AT2G16920, AT5G48700, AT3G13235, AT4G06599, AT1G53980, AT2G30110, AT5G05080, AT2G02760, AT2G32790, AT2G33770, AT1G70320, AT1G55860, AT1G22510, AT5G62460, AT5G37280, AT4G03510, AT2G17730, AT3G48070, AT1G27910, AT4G03965, AT2G25360, AT1G22500, AT4G01023, AT5…	Symbols: ATSBT1.1, SBTI1.1 | SBTI1.1; serine-type endopeptidase | chr1:310316-313130 FORWARD ||| identical protein binding / serine-type endopeptidase | chr4:8581373-8584122 REVERSE ||| subtilase family protein | chr1:10841142-10845050 REVERSE ||| subtilase family protein | chr3:4741473-4744117 REVERSE ||| ubiquitin family protein | chr1:23944722-23945772 REVERSE ||| phosphatidylinositol 3- and 4…
protein.degradation.ubiquitin.E3	88	619	1.07719	0.587266	AT1G70320, AT1G55860, AT1G22510, AT5G62460, AT5G37280, AT4G03510, AT2G17730, AT3G48070, AT1G27910, AT4G03965, AT2G25360, AT1G22500, AT4G01023, AT5G42940, AT4G26400, AT1G45180, AT5G40140, AT1G03370, AT3G27330, AT4G17910, AT3G60300, AT1G59560, AT1G61620, AT4G32600, AT5G03180, AT4G12140, AT2G15530, AT1G43860, AT4G08590, AT2G01275, AT1G77770, AT4G07869, AT5G02930, AT2G44130, AT5G38393, AT3G48880, AT3…	Symbols: UPL2 | UPL2 (UBIQUITIN-PROTEIN LIGASE 2); ubiquitin-protein ligase | chr1:26488522-26501281 REVERSE ||| Symbols: UPL1 | UPL1 (UBIQUITIN-PROTEIN LIGASE 1); ubiquitin-protein ligase | chr1:20879466-20895393 REVERSE ||| zinc finger (C3HC4-type RING finger) family protein | chr1:7950819-7952673 REVERSE ||| zinc finger (C3HC4-type RING finger) family protein | chr5:25074883-25077294 FORWARD |…
cell wall	32	221	1.09889	0.587266	AT1G01220, AT3G53520, AT5G66280, AT3G14790, AT1G79500, AT3G07330, AT1G23480, AT2G21770, AT5G44030, AT4G24010, AT5G05170, AT3G29810, AT2G15350, AT5G25310, AT4G01220, AT5G14380, AT5G55730, AT5G60490, AT4G14900, AT1G23460, AT2G43890, AT1G19170, AT3G27400, AT3G61490, AT1G23470, AT2G36870, AT5G39310, AT5G09760, AT3G24130, AT3G10710, AT3G17060, AT1G56100	GHMP kinase-related | chr1:91750-95651 FORWARD ||| Symbols: UXS1, ATUXS1 | UXS1 (UDP-GLUCURONIC ACID DECARBOXYLASE 1); UDP-glucuronate decarboxylase/ catalytic | chr3:19841484-19844308 FORWARD ||| Symbols: GMD1 | GMD1 (GDP-D-MANNOSE 4,6-DEHYDRATASE 1); GDP-mannose 4,6-dehydratase/ binding / catalytic/ coenzyme binding | chr5:26476166-26477754 FORWARD ||| Symbols: RHM3, ATRHM3 | RHM3 (RHAMNOSE BIO…
protein.targeting.secretory pathway	10	61	1.27215	0.587266	AT3G44340, AT4G01810, AT1G05520, AT3G27530, AT3G51310, AT5G53530, AT2G05170, AT2G38020, AT1G78720, AT1G48240	Symbols: CEF | CEF (clone eighty-four); protein binding / transporter/ zinc ion binding | chr3:16011621-16020254 REVERSE ||| protein transport protein-related | chr4:776488-780355 REVERSE ||| transport protein, putative | chr1:1630900-1635711 REVERSE ||| Symbols: GC6 | GC6 (golgin candidate 6); binding / protein transporter | chr3:10193569-10200013 REVERSE ||| Symbols: VPS35C | VPS35C (VPS35 HOMO…
secondary metabolism.isoprenoids	9	57	1.21621	0.587266	AT4G24490, AT5G62790, AT3G29420, AT3G04870, AT3G10230, AT1G48820, AT5G48110, AT5G36150, AT4G15870, AT1G76790	protein prenyltransferase | chr4:12655059-12658336 REVERSE ||| Symbols: DXR, PDE129 | DXR (1-DEOXY-D-XYLULOSE 5-PHOSPHATE REDUCTOISOMERASE); 1-deoxy-D-xylulose-5-phosphate reductoisomerase | chr5:25214125-25217439 REVERSE ||| geranylgeranyl pyrophosphate synthase-related / GGPP synthetase-related / farnesyltranstransferase-related | chr3:11307007-11308078 FORWARD ||| Symbols: ZDS, PDE181 | ZDS (Z…
RNA.regulation of transcription.MADS box transcription factor family	8	47	1.33077	0.587266	AT5G27050, AT3G49400, AT4G36590, AT1G31640, AT5G27090, AT4G09960, AT2G34440, AT1G22590	Symbols: AGL101 | AGL101; transcription factor | chr5:9520276-9520638 FORWARD ||| transducin family protein / WD-40 repeat family protein | chr3:18319249-18324482 REVERSE ||| MADS-box protein (AGL40) | chr4:17260937-17262227 REVERSE ||| Symbols: AGL92 | AGL92 (AGAMOUS-LIKE 92); DNA binding / transcription factor | chr1:11322692-11324176 REVERSE ||| Symbols: AGL54 | AGL54; transcription factor | c…
misc.acid and other phosphatases	6	36	1.29716	0.587266	AT2G39920, AT3G50920, AT1G52940, AT5G46410, AT2G18130, AT4G08136	acid phosphatase class B family protein | chr2:16663017-16664538 REVERSE ||| phosphatidic acid phosphatase-related / PAP2-related | chr3:18922387-18923596 REVERSE ||| Symbols: PAP5, ATPAP5 | PAP5 (PURPLE ACID PHOSPHATASE 5); acid phosphatase/ protein serine/threonine phosphatase | chr1:19716402-19723725 FORWARD ||| NLI interacting factor (NIF) family protein | chr5:18825103-18829221 FORWARD ||| S…
RNA.regulation of transcription.HB,Homeobox transcription factor family	6	34	1.38999	0.587266	AT3G18380, AT1G62990, AT1G28420, AT2G17950, AT3G17050, AT1G44890	sequence-specific DNA binding / transcription factor | chr3:6310736-6313318 REVERSE ||| Symbols: KNAT7, IXR11 | KNAT7 (KNOTTED-LIKE HOMEOBOX OF ARABIDOPSIS THALIANA 7); DNA binding / transcription activator/ transcription factor | chr1:23337365-23340688 FORWARD ||| Symbols: HB-1 | HB-1 (homeobox-1); transcription factor | chr1:9979802-9987638 FORWARD ||| Symbols: WUS, PGA6, WUS1 | WUS (WUSCHEL); …
transport.p- and v-ATPases	5	29	1.35116	0.587266	AT1G59820, AT2G21410, AT2G16510, AT3G28710, AT3G42050, AT1G44750, AT5G26820, AT5G44790, AT4G18790, AT3G46900, AT5G03280, AT1G68570, AT1G27080, AT1G22540, AT1G22550, AT5G53520, AT5G22830, AT2G03620, AT5G23630, AT2G01980, AT5G14880, AT4G00630, AT1G60160, AT4G01840, AT5G19410, AT1G53270, AT4G25750, AT2G41700, AT4G15230, AT4G15215, AT3G28345, AT5G49890, AT3G06450, AT1G55620, AT1G01910, AT3G26520, AT3…	Symbols: ALA3 | ALA3 (Aminophospholipid ATPase3); ATPase, coupled to transmembrane movement of ions, phosphorylative mechanism / phospholipid transporter | chr1:22011328-22020294 FORWARD ||| Symbols: VHA-A2 | VHA-A2 (VACUOLAR PROTON ATPASE A2); ATPase | chr2:9162620-9168452 FORWARD ||| vacuolar ATP synthase 16 kDa proteolipid subunit 5 / V-ATPase 16 kDa proteolipid subunit 5 (AVAP5) | chr2:715962…
cell wall.precursor synthesis	5	28	1.40999	0.587266	AT1G01220, AT3G53520, AT5G66280, AT3G14790, AT1G79500	GHMP kinase-related | chr1:91750-95651 FORWARD ||| Symbols: UXS1, ATUXS1 | UXS1 (UDP-GLUCURONIC ACID DECARBOXYLASE 1); UDP-glucuronate decarboxylase/ catalytic | chr3:19841484-19844308 FORWARD ||| Symbols: GMD1 | GMD1 (GDP-D-MANNOSE 4,6-DEHYDRATASE 1); GDP-mannose 4,6-dehydratase/ binding / catalytic/ coenzyme binding | chr5:26476166-26477754 FORWARD ||| Symbols: RHM3, ATRHM3 | RHM3 (RHAMNOSE BIO…
transport.peptides and oligopeptides	5	28	1.40999	0.587266	AT1G68570, AT1G27080, AT1G22540, AT1G22550, AT5G53520	proton-dependent oligopeptide transport (POT) family protein | chr1:25746736-25750275 FORWARD ||| Symbols: NRT1.6 | NRT1.6 (NITRATE TRANSPORTER 1.6); low affinity nitrate transmembrane transporter/ transporter | chr1:9400664-9403789 FORWARD ||| proton-dependent oligopeptide transport (POT) family protein | chr1:7964042-7966436 FORWARD ||| proton-dependent oligopeptide transport (POT) family prote…
glycolysis.cytosolic branch	4	22	1.44118	0.587266	AT5G42740, AT1G07110, AT4G26520, AT2G36530	glucose-6-phosphate isomerase, cytosolic (PGIC) | chr5:17135692-17140892 FORWARD ||| Symbols: F2KP, ATF2KP, FKFBP | F2KP (FRUCTOSE-2,6-BISPHOSPHATASE); fructose-2,6-bisphosphate 2-phosphatase | chr1:2178104-2184148 REVERSE ||| fructose-bisphosphate aldolase, cytoplasmic | chr4:13388386-13390374 FORWARD ||| Symbols: LOS2 | LOS2; copper ion binding / phosphopyruvate hydratase | chr2:15320756-153238…
cell wall.pectin*esterases.PME	4	22	1.44118	0.587266	AT5G09760, AT3G24130, AT3G10710, AT3G17060	pectinesterase family protein | chr5:3032375-3034543 FORWARD ||| pectinesterase family protein | chr3:8711663-8713424 REVERSE ||| pectinesterase family protein | chr3:3352289-3354237 FORWARD ||| pectinesterase family protein | chr3:5816672-5818498 REVERSE
transport.unspecified cations	4	22	1.44118	0.587266	AT5G22830, AT2G03620, AT5G23630, AT2G01980	Symbols: ATMGT10, GMN10 | ATMGT10 (MAGNESIUM (MG) TRANSPORTER 10); magnesium ion transmembrane transporter | chr5:7627597-7630993 FORWARD ||| magnesium transporter CorA-like family protein (MRS2-5) | chr2:1100339-1102768 REVERSE ||| ATPase E1-E2 type family protein / haloacid dehalogenase-like hydrolase familiy protein | chr5:7960478-7967946 REVERSE ||| Symbols: SOS1, ATSOS1, ATNHX7 | SOS1 (SALT …
misc.beta 1,3 glucan hydrolases.glucan endo-1,3-beta-glucosidase	4	21	1.52605	0.587266	AT1G62095, AT1G66250, AT3G07320, AT1G32860	Pseudogene of AT1G11820; hydrolase, hydrolyzing O-glycosyl compounds | chr1:22955926-22956483 REVERSEweakly similar to ( 130)AT1G11820hydrolase, hydrolyzing O-glycosyl compounds | chr1:3991258-3993326 REVERSE ||| glycosyl hydrolase family 17 protein | chr1:24692894-24695515 FORWARD ||| glycosyl hydrolase family 17 protein | chr3:2332022-2334074 REVERSE ||| glycosyl hydrolase family 17 protein | c…
protein.synthesis.elongation	4	21	1.52605	0.587266	AT4G02930, AT2G31060, AT2G45030, AT3G49470	elongation factor Tu, putative / EF-Tu, putative | chr4:1295409-1298404 REVERSE ||| elongation factor family protein | chr2:13213172-13218585 REVERSE ||| mitochondrial elongation factor, putative | chr2:18572411-18576970 FORWARD ||| Symbols: NACA2 | NACA2 (NASCENT POLYPEPTIDE-ASSOCIATED COMPLEX SUBUNIT ALPHA-LIKE PROTEIN 2) | chr3:18340976-18342489 FORWARD
lipid metabolism.exotics (steroids, squalene etc).sphingolipids	3	15	1.62126	0.587266	AT3G19260, AT2G38010, AT2G19880, AT3G03310	Symbols: LAG1 HOMOLOG 2, LOH2 | LOH2 (LAG ONE HOMOLOGUE 2) | chr3:6669146-6671519 REVERSE ||| ceramidase family protein | chr2:15906862-15909931 FORWARD ||| ceramide glucosyltransferase, putative | chr2:8581358-8585478 FORWARD ||| lecithin:cholesterol acyltransferase family protein / LACT family protein | chr3:778568-781580 REVERSE
protein.postranslational modification.kinase.receptor like cytoplasmatic kinase IX	3	15	1.62126	0.587266	AT2G19410, AT1G16760, AT3G20200	protein kinase family protein | chr2:8404901-8409012 REVERSE ||| protein kinase family protein | chr1:5734234-5737307 FORWARD ||| protein kinase family protein | chr3:7047581-7051342 FORWARD
hormone metabolism.brassinosteroid.synthesis-degradation	3	14	1.76876	0.587266	AT2G16530, AT5G24140, AT2G22830	3-oxo-5-alpha-steroid 4-dehydrogenase family protein / steroid 5-alpha-reductase family protein | chr2:7162989-7165323 REVERSE ||| Symbols: SQP2 | SQP2; FAD binding / oxidoreductase/ squalene monooxygenase | chr5:8164347-8167673 REVERSE ||| Symbols: SQE2 | SQE2 (squalene epoxidase 2); FAD binding / oxidoreductase/ squalene monooxygenase | chr2:9723680-9726270 REVERSE
nucleotide metabolism	13	86	1.15518	0.605242	AT3G55010, AT4G18440, AT5G18280, AT4G29580, AT5G09290, AT4G12440, AT5G40870, AT1G73980, AT3G46200, AT3G60961, AT4G34570, AT2G21790, AT5G40942	Symbols: ATPURM, PUR5 | PUR5; ATP binding / phosphoribosylformylglycinamidine cyclo-ligase | chr3:20386619-20388806 FORWARD ||| adenylosuccinate lyase, putative / adenylosuccinase, putative | chr4:10186131-10188909 REVERSE ||| Symbols: ATAPY2, APY2 | ATAPY2 (ARABIDOPSIS THALIANA APYRASE 2); ATPase/ nucleotide diphosphatase | chr5:6050514-6054875 REVERSE ||| cytidine deaminase, putative / cytidine…
protein.synthesis.ribosomal protein.eukaryotic.60S subunit	9	58	1.1913	0.61428	AT3G13580, AT4G10450, AT3G01790, AT1G22110, AT1G52300, AT2G25210, AT5G47700, AT3G24830, AT4G13170	60S ribosomal protein L7 (RPL7D) | chr3:4433171-4435305 FORWARD ||| 60S ribosomal protein L9 (RPL90D) | chr4:6462953-6464544 REVERSE ||| ribosomal protein L13 family protein | chr3:283709-285760 REVERSE ||| structural constituent of ribosome | chr1:7800507-7802562 REVERSE ||| 60S ribosomal protein L37 (RPL37B) | chr1:19474898-19476234 REVERSE ||| 60S ribosomal protein L39 (RPL39A) | chr2:10739855…
C1-metabolism	4	23	1.36524	0.61428	AT1G22020, AT4G32520, AT5G13050, AT3G55630	Symbols: SHM6 | SHM6 (serine hydroxymethyltransferase 6); catalytic/ glycine hydroxymethyltransferase/ pyridoxal phosphate binding | chr1:7754321-7757383 FORWARD ||| Symbols: SHM3 | SHM3 (SERINE HYDROXYMETHYLTRANSFERASE 3); catalytic/ glycine hydroxymethyltransferase/ pyridoxal phosphate binding | chr4:15689464-15692857 REVERSE ||| Symbols: 5-FCL | 5-FCL (5-FORMYLTETRAHYDROFOLATE CYCLOLIGASE); 5-…
RNA.regulation of transcription.SET-domain transcriptional regulator family	4	23	1.36524	0.61428	AT1G26760, AT1G05830, AT1G73100, AT2G35160	Symbols: ATXR1, SDG35 | SDG35 (SET DOMAIN PROTEIN 35); binding | chr1:9248152-9249943 REVERSE ||| Symbols: ATX2, SDG30 | ATX2 (ARABIDOPSIS TRITHORAX-LIKE PROTEIN 2); DNA binding / histone methyltransferase(H3-K4 specific) | chr1:1754244-1761817 FORWARD ||| Symbols: SUVH3, SDG19 | SUVH3 (SU(VAR)3-9 HOMOLOG 3); histone methyltransferase | chr1:27491184-27494182 FORWARD ||| Symbols: SUVH5, SGD9 | SU…
misc.UDP glucosyl and glucoronyl transferases	11	73	1.15073	0.635382	AT4G15550, AT3G24040, AT3G15940, AT4G15480, AT3G01040, AT5G62220, AT4G38270, AT5G38040, AT5G07720, AT5G03490, AT2G20810, AT5G56480, AT4G22520, AT4G12510, AT3G22600, AT4G20760, AT4G11410, AT5G16800, AT4G37670, AT2G30330, AT5G27410, AT5G37690, AT3G43570, AT1G53940	Symbols: IAGLU | IAGLU (INDOLE-3-ACETATE BETA-D-GLUCOSYLTRANSFERASE); UDP-glycosyltransferase/ transferase, transferring glycosyl groups | chr4:8877590-8879327 REVERSE ||| glycosyltransferase family 14 protein / core-2/I-branching enzyme family protein | chr3:8680877-8683289 REVERSE ||| glycosyl transferase family 1 protein | chr3:5393513-5396759 REVERSE ||| Symbols: UGT84A1 | UGT84A1; UDP-glycos…
secondary metabolism	24	172	1.05169	0.642533	AT4G24490, AT5G62790, AT3G29420, AT3G04870, AT3G10230, AT1G48820, AT5G48110, AT5G36150, AT4G15870, AT4G13262, AT5G42830, AT1G77670, AT2G22570, AT5G01210, AT1G35513, AT1G31490, AT3G50740, AT2G30490, AT4G36220, AT3G51430, AT3G51440, AT1G56650, AT4G13660, AT1G76790	protein prenyltransferase | chr4:12655059-12658336 REVERSE ||| Symbols: DXR, PDE129 | DXR (1-DEOXY-D-XYLULOSE 5-PHOSPHATE REDUCTOISOMERASE); 1-deoxy-D-xylulose-5-phosphate reductoisomerase | chr5:25214125-25217439 REVERSE ||| geranylgeranyl pyrophosphate synthase-related / GGPP synthetase-related / farnesyltranstransferase-related | chr3:11307007-11308078 FORWARD ||| Symbols: ZDS, PDE181 | ZDS (Z…
stress.biotic.PR-proteins.plant defensins	14	97	1.09395	0.642533	AT5G50423, AT1G63535, AT5G48605, AT2G20465, AT1G55010, AT2G20463, AT5G43525, AT3G33187, AT2G22807, AT5G08315, AT1G63522, AT5G04045, AT3G24508, AT1G48422	Encodes a defensin-like (DEFL) family protein. | chr5:20532860-20533471 REVERSE ||| Encodes a defensin-like (DEFL) family protein. | chr1:23566045-23566227 REVERSE ||| Encodes a defensin-like (DEFL) family protein. | chr5:19710215-19710578 FORWARD ||| Encodes a defensin-like (DEFL) family protein. | chr2:8825053-8825544 REVERSE ||| Symbols: PDF1.5 | PDF1.5 (plant defensin 1.5) | chr1:20517078-205…
RNA.regulation of transcription.MYB domain transcription factor family	9	59	1.16739	0.642533	AT5G47290, AT3G50060, AT3G10113, AT1G06910, AT2G23290, AT3G52250, AT2G26960, AT3G09370, AT1G55964	myb family transcription factor | chr5:19197040-19197431 REVERSE ||| Symbols: MYB77 | MYB77; DNA binding / transcription factor | chr3:18557970-18559106 REVERSE ||| myb family transcription factor | chr3:3118043-3119391 REVERSE ||| Symbols: TRFL7 | TRFL7 (TRF-LIKE 7); DNA binding / transcription factor | chr1:2120991-2123748 FORWARD ||| Symbols: AtMYB70 | AtMYB70 (myb domain protein 70); DNA bind…
RNA.processing.splicing	7	45	1.19463	0.642533	AT1G80070, AT1G10320, AT2G33340, AT1G03140, AT4G14342, AT1G54080, AT3G13570, AT2G25100, AT1G60080, AT5G02250, AT3G20420, AT3G04480, AT5G25800	Symbols: SUS2, EMB33, EMB177, EMB14 | SUS2 (ABNORMAL SUSPENSOR 2) | chr1:30118052-30127811 FORWARD ||| U2 snRNP auxiliary factor-related | chr1:3384164-3388373 REVERSE ||| nucleotide binding / ubiquitin-protein ligase | chr2:14126217-14131153 REVERSE ||| splicing factor Prp18 family protein | chr1:754371-756303 REVERSE ||| pre-mRNA splicing factor 10 kDa subunit, putative | chr4:8253550-8255508 R…
cell wall.pectin*esterases	5	32	1.20079	0.642533	AT5G09760, AT3G24130, AT3G10710, AT3G17060, AT1G56100	pectinesterase family protein | chr5:3032375-3034543 FORWARD ||| pectinesterase family protein | chr3:8711663-8713424 REVERSE ||| pectinesterase family protein | chr3:3352289-3354237 FORWARD ||| pectinesterase family protein | chr3:5816672-5818498 REVERSE ||| pectinesterase inhibitor domain-containing protein | chr1:20980369-20983979 REVERSE
misc.nitrilases, *nitrile lyases, berberine bridge enzymes, reticuline oxidases, troponine reductases	5	32	1.20079	0.642533	AT2G23610, AT2G23620, AT1G30730, AT1G30760, AT1G44180	Symbols: ATMES3, MES3 | MES3 (METHYL ESTERASE 3); hydrolase, acting on ester bonds / methyl indole-3-acetate esterase/ methyl jasmonate esterase | chr2:10044179-10046532 REVERSE ||| Symbols: ATMES1, MES1 | MES1 (METHYL ESTERASE 1); hydrolase, acting on ester bonds / methyl indole-3-acetate esterase/ methyl jasmonate esterase/ methyl salicylate esterase | chr2:10047379-10049291 REVERSE ||| FAD-bin…
lipid metabolism.exotics (steroids, squalene etc)	5	31	1.24706	0.642533	AT3G19260, AT2G38010, AT2G19880, AT2G43420, AT3G03310	Symbols: LAG1 HOMOLOG 2, LOH2 | LOH2 (LAG ONE HOMOLOGUE 2) | chr3:6669146-6671519 REVERSE ||| ceramidase family protein | chr2:15906862-15909931 FORWARD ||| ceramide glucosyltransferase, putative | chr2:8581358-8585478 FORWARD ||| 3-beta hydroxysteroid dehydrogenase/isomerase family protein | chr2:18031268-18035098 REVERSE ||| lecithin:cholesterol acyltransferase family protein / LACT family prot…
tetrapyrrole synthesis	5	31	1.24706	0.642533	AT5G08280, AT1G08520, AT2G26670, AT3G59400, AT1G17100	Symbols: HEMC | HEMC (HYDROXYMETHYLBILANE SYNTHASE); hydroxymethylbilane synthase | chr5:2663499-2665792 REVERSE ||| Symbols: PDE166, CHLD | CHLD; ATP binding / magnesium chelatase/ nucleoside-triphosphatase/ nucleotide binding | chr1:2696412-2700959 FORWARD ||| Symbols: ATHO1, HO1, TED4, GUN2, HY6 | TED4 (REVERSAL OF THE DET PHENOTYPE 4); heme oxygenase (decyclizing) | chr2:11341684-11343572 FOR…
misc.peroxidases	4	25	1.23507	0.642533	AT5G14130, AT3G17070, AT1G34330, AT5G40150	peroxidase, putative | chr5:4558704-4560067 REVERSE ||| peroxidase, putative | chr3:5820961-5823199 FORWARD ||| pseudogene, putative peroxidase, similar to anionic peroxidase GI:559235 from (Petroselinum crispum); blastp match of 35% identity and 2.3e-53 P-value to GP|21426121|gb|AAM52318.1|AC105363_7|AC105363 Putative peroxidase {Oryza sativa (japonica cultivar-group)} | chr1:12528095-12529132 F…
protein.degradation.metalloprotease	4	25	1.23507	0.642533	AT5G53170, AT3G19170, AT5G56730, AT4G23940	Symbols: FTSH11 | FTSH11 (FtsH protease 11); ATP-dependent peptidase/ ATPase/ metallopeptidase | chr5:21562747-21568012 REVERSE ||| Symbols: ATPREP1, ATZNMP | ATPREP1 (PRESEQUENCE PROTEASE 1); metalloendopeptidase | chr3:6625421-6632033 REVERSE ||| peptidase M16 family protein / insulinase family protein | chr5:22946906-22952576 REVERSE ||| FtsH protease, putative | chr4:12437108-12441968 FORWARD
major CHO metabolism.synthesis	4	24	1.2969	0.642533	AT5G11110, AT3G54270, AT2G36390, AT2G39930	Symbols: SPS1, ATSPS2F, KNS2 | ATSPS2F (SUCROSE PHOSPHATE SYNTHASE 2F); sucrose-phosphate synthase | chr5:3536226-3541133 FORWARD ||| sucrose-phosphatase 3 (SPP3) | chr3:20087082-20089846 REVERSE ||| Symbols: SBE2.1, BE3 | SBE2.1 (starch branching enzyme 2.1); 1,4-alpha-glucan branching enzyme | chr2:15264237-15270092 FORWARD ||| Symbols: ISA1, ATISA1 | ISA1 (ISOAMYLASE 1); alpha-amylase/ isoamyl…
protein.degradation.ubiquitin.ubiquitin	4	24	1.2969	0.642533	AT5G48700, AT3G13235, AT4G06599, AT1G53980	ubiquitin-related | chr5:19749494-19750013 REVERSE ||| ubiquitin family protein | chr3:4271258-4274455 REVERSE ||| ubiquitin family protein | chr4:3665925-3667547 REVERSE ||| polyubiquitin-related | chr1:20149334-20149609 REVERSE
secondary metabolism.isoprenoids.non-mevalonate pathway	3	18	1.29677	0.642533	AT4G24490, AT5G62790, AT3G29420	protein prenyltransferase | chr4:12655059-12658336 REVERSE ||| Symbols: DXR, PDE129 | DXR (1-DEOXY-D-XYLULOSE 5-PHOSPHATE REDUCTOISOMERASE); 1-deoxy-D-xylulose-5-phosphate reductoisomerase | chr5:25214125-25217439 REVERSE ||| geranylgeranyl pyrophosphate synthase-related / GGPP synthetase-related / farnesyltranstransferase-related | chr3:11307007-11308078 FORWARD
RNA.regulation of transcription.C3H zinc finger family	3	18	1.29677	0.642533	AT2G15271, AT5G43630, AT5G40880	Pseudogene of AT5G49200; WD-40 repeat family protein / zfwd4 protein (ZFWD4) | chr2:6639457-6639868 REVERSEweakly similar to ( 105)AT5G40880WD-40 repeat family protein / zfwd3 protein (ZFWD3) | chr5:16396709-16398433 FORWARD ||| Symbols: TZP | TZP; DNA binding / nucleic acid binding / zinc ion binding | chr5:17526751-17530516 FORWARD ||| WD-40 repeat family protein / zfwd3 protein (ZFWD3) | chr5:…
lipid metabolism.lipid degradation.lipases	3	17	1.38948	0.642533	AT5G24210, AT4G16070, AT4G13550	lipase class 3 family protein | chr5:8217335-8219619 FORWARD ||| lipase class 3 family protein | chr4:9096730-9100841 REVERSE ||| triacylglycerol lipase | chr4:7871057-7876963 REVERSE
transport.Major Intrinsic Proteins	3	17	1.38948	0.642533	AT3G26520, AT3G47440, AT4G19030	Symbols: TIP2, SITIP, GAMMA-TIP2, TIP1;2 | TIP2 (TONOPLAST INTRINSIC PROTEIN 2); water channel | chr3:9722443-9723815 REVERSE ||| Symbols: TIP5;1 | TIP5;1 (tonoplast intrinsic protein 5;1); urea transmembrane transporter/ water channel | chr3:17482025-17483158 FORWARD ||| Symbols: NLM1, NIP1;1, AT-NLM1 | NLM1; arsenite transmembrane transporter/ water channel | chr4:10421525-10423487 REVERSE
protein.targeting.mitochondria	2	11	1.4408	0.642533	AT2G36070, AT3G04800	Symbols: ATTIM44-2 | ATTIM44-2; protein-transmembrane transporting ATPase | chr2:15144836-15148131 REVERSE ||| Symbols: ATTIM23-3 | ATTIM23-3; P-P-bond-hydrolysis-driven protein transmembrane transporter/ protein transporter | chr3:1314479-1315045 REVERSE
protein.assembly and cofactor ligation	2	11	1.4408	0.642533	AT3G10670, AT3G20970	Symbols: ATNAP7 | ATNAP7; ATPase, coupled to transmembrane movement of substances / protein binding / transporter | chr3:3335049-3337387 REVERSE ||| Symbols: NFU4, ATNFU2 | NFU4; structural molecule | chr3:7348197-7350305 FORWARD
signalling.receptor kinases.leucine rich repeat I	2	11	1.4408	0.642533	AT1G07550, AT5G15730, AT1G34110, AT1G72180, AT1G35710, AT4G08850, AT5G51350, AT4G11470, AT4G11500, AT4G11490, AT4G11480, AT4G04500, AT3G45860, AT4G04510, AT2G20300	leucine-rich repeat protein kinase, putative | chr1:2322653-2326561 REVERSE ||| serine/threonine protein kinase, putative | chr5:5130503-5133187 FORWARD ||| leucine-rich repeat transmembrane protein kinase, putative | chr1:12417176-12421189 REVERSE ||| leucine-rich repeat transmembrane protein kinase, putative | chr1:27162820-27167430 FORWARD ||| leucine-rich repeat transmembrane protein kinase, …
signalling.phosphinositides.phosphatidylinositol-4-phosphate 5-kinase	2	11	1.4408	0.642533	AT1G34260, AT2G41210	phosphatidylinositol-4-phosphate 5-kinase family protein | chr1:12485967-12492169 FORWARD ||| Symbols: PIP5K5 | PIP5K5 (PHOSPHATIDYLINOSITOL- 4-PHOSPHATE 5-KINASE 5); 1-phosphatidylinositol-4-phosphate 5-kinase | chr2:17173413-17176807 FORWARD
cell wall.hemicellulose synthesis	2	10	1.62099	0.642533	AT2G15350, AT5G25310	Symbols: FUT10, ATFUT10 | FUT10 (FUCOSYLTRANSFERASE 10); fucosyltransferase/ transferase, transferring glycosyl groups | chr2:6688140-6689462 REVERSE ||| catalytic | chr5:8784820-8787366 FORWARD
amino acid metabolism.synthesis.central amino acid metabolism	2	10	1.62099	0.642533	AT5G11520, AT2G38400	Symbols: ASP3, YLS4 | ASP3 (ASPARTATE AMINOTRANSFERASE 3); L-aspartate:2-oxoglutarate aminotransferase | chr5:3685089-3687764 REVERSE ||| Symbols: AGT3 | AGT3 (ALANINE:GLYOXYLATE AMINOTRANSFERASE 3); alanine-glyoxylate transaminase/ catalytic/ pyridoxal phosphate binding / transaminase | chr2:16083689-16086349 FORWARD
nucleotide metabolism.synthesis.purine	2	10	1.62099	0.642533	AT3G55010, AT4G18440	Symbols: ATPURM, PUR5 | PUR5; ATP binding / phosphoribosylformylglycinamidine cyclo-ligase | chr3:20386619-20388806 FORWARD ||| adenylosuccinate lyase, putative / adenylosuccinase, putative | chr4:10186131-10188909 REVERSE
protein.synthesis	58	424	1.02791	0.643979	AT2G33800, AT3G25920, AT2G16930, AT5G40950, AT3G03600, AT1G16870, AT4G37660, AT5G27820, AT2G24090, AT5G16200, AT1G66890, AT3G45020, AT3G45030, AT5G03850, AT3G04770, AT3G13580, AT4G10450, AT3G01790, AT1G22110, AT1G52300, AT2G25210, AT5G47700, AT3G24830, AT4G13170, AT3G49080, AT3G08720, AT5G38640, AT4G11160, AT3G56150, AT5G35620, AT3G55620, AT2G45730, AT4G02930, AT2G31060, AT2G45030, AT3G49470, AT2…	ribosomal protein S5 family protein | chr2:14300772-14302430 REVERSE ||| Symbols: RPL15 | RPL15; structural constituent of ribosome | chr3:9491055-9492635 REVERSE ||| ribosomal protein L27 family protein | chr2:7341120-7342302 FORWARD ||| Symbols: RPL27 | RPL27 (RIBOSOMAL PROTEIN LARGE SUBUNIT 27); structural constituent of ribosome | chr5:16410782-16412063 FORWARD ||| Symbols: RPS2 | RPS2 (RIBOS…
amino acid metabolism.degradation	4	26	1.17884	0.666002	AT4G08900, AT5G09300, AT4G14430, AT4G14440	arginase | chr4:5703347-5705346 FORWARD ||| 2-oxoisovalerate dehydrogenase, putative / 3-methyl-2-oxobutanoate dehydrogenase, putative / branched-chain alpha-keto acid dehydrogenase E1 alpha subunit, putative | chr5:2884179-2886863 REVERSE ||| Symbols: IBR10, ATECI2, ECI2, ECHIB, PEC12 | IBR10 (INDOLE-3-BUTYRIC ACID RESPONSE 10); catalytic/ dodecenoyl-CoA delta-isomerase | chr4:8304600-8305705 RE…
nucleotide metabolism.salvage	4	26	1.17884	0.666002	AT4G12440, AT5G40870, AT1G73980, AT3G46200	Symbols: APT4 | adenine phosphoribosyltransferase, putative | chr4:7376268-7380151 FORWARD ||| Symbols: AtUK/UPRT1 | AtUK/UPRT1 (Uridine kinase/Uracil phosphoribosyltransferase 1); ATP binding / kinase/ uracil phosphoribosyltransferase/ uridine kinase | chr5:16374908-16378652 FORWARD ||| phosphoribulokinase/uridine kinase family protein | chr1:27820149-27824036 REVERSE ||| Symbols: aTNUDT9 | aTNU…
RNA.processing.RNA helicase	4	26	1.17884	0.666002	AT5G61140, AT2G35340, AT4G18465, AT3G62310	DEAD box RNA helicase, putative | chr5:24589999-24603514 FORWARD ||| Symbols: MEE29 | MEE29 (maternal effect embryo arrest 29); ATP binding / ATP-dependent RNA helicase/ ATP-dependent helicase/ helicase/ nucleic acid binding | chr2:14872320-14879739 FORWARD ||| RNA helicase, putative | chr4:10197056-10201611 FORWARD ||| RNA helicase, putative | chr3:23057245-23060731 REVERSE
protein.synthesis.ribosomal protein.prokaryotic.chloroplast	4	26	1.17884	0.666002	AT2G33800, AT3G25920, AT2G16930, AT5G40950	ribosomal protein S5 family protein | chr2:14300772-14302430 REVERSE ||| Symbols: RPL15 | RPL15; structural constituent of ribosome | chr3:9491055-9492635 REVERSE ||| ribosomal protein L27 family protein | chr2:7341120-7342302 FORWARD ||| Symbols: RPL27 | RPL27 (RIBOSOMAL PROTEIN LARGE SUBUNIT 27); structural constituent of ribosome | chr5:16410782-16412063 FORWARD
mitochondrial electron transport / ATP synthesis.NADH-DH	3	19	1.21565	0.676645	AT1G19580, AT1G47260, AT1G16700	Symbols: GAMMA CA1 | GAMMA CA1 (GAMMA CARBONIC ANHYDRASE 1); carbonate dehydratase | chr1:6774763-6777456 FORWARD ||| Symbols: APFI, GAMMA CA2 | GAMMA CA2 (GAMMA CARBONIC ANHYDRASE 2); carbonate dehydratase | chr1:17321173-17323484 REVERSE ||| NADH-ubiquinone oxidoreductase 23 kDa subunit, mitochondrial, putative | chr1:5709725-5711902 FORWARD
metal handling.binding, chelation and storage	3	19	1.21565	0.676645	AT2G36880, AT1G78330, AT3G02960	Symbols: MAT3 | MAT3 (methionine adenosyltransferase 3); copper ion binding / methionine adenosyltransferase | chr2:15479366-15481412 REVERSE ||| pseudogene, putative serine acetyltransferase, blastp match of 78% identity and 4.2e-32 P-value to GP|22758278|gb|AAN05506.1||AC099399 Putative serine acetyltransferase {Oryza sativa (japonica cultivar-group)} | chr1:29469848-29471958 REVERSE ||| copper…
cell.cycle.peptidylprolyl isomerase	3	19	1.21565	0.676645	AT3G21481, AT1G26940, AT4G33060	Pseudogene of AT4G34870; ROC5 (ROTAMASE CYP 5); peptidyl-prolyl cis-trans isomerase | chr3:7572232-7572483 REVERSE ||| peptidyl-prolyl cis-trans isomerase cyclophilin-type family protein | chr1:9343126-9345145 FORWARD ||| peptidyl-prolyl cis-trans isomerase cyclophilin-type family protein | chr4:15948490-15952223 FORWARD
protein.synthesis.ribosomal protein.eukaryotic	12	86	1.05142	0.6843	AT3G45030, AT5G03850, AT3G04770, AT3G13580, AT4G10450, AT3G01790, AT1G22110, AT1G52300, AT2G25210, AT5G47700, AT3G24830, AT4G13170	40S ribosomal protein S20 (RPS20A) | chr3:16471386-16472393 REVERSE ||| 40S ribosomal protein S28 (RPS28B) | chr5:1028340-1029121 REVERSE ||| Symbols: RPSAb | RPSAb (40S ribosomal protein SA B); structural constituent of ribosome | chr3:1309294-1310887 REVERSE ||| 60S ribosomal protein L7 (RPL7D) | chr3:4433171-4435305 FORWARD ||| 60S ribosomal protein L9 (RPL90D) | chr4:6462953-6464544 REVERSE |…
transport.metal	5	34	1.11781	0.6843	AT5G26820, AT5G44790, AT4G18790, AT3G46900, AT5G03280	Symbols: ATIREG3 | ATIREG3 (IRON-REGULATED PROTEIN 3) | chr5:9433619-9437105 FORWARD ||| Symbols: RAN1, HMA7 | RAN1 (RESPONSIVE-TO-ANTAGONIST 1); ATPase, coupled to transmembrane movement of ions, phosphorylative mechanism / copper ion transmembrane transporter | chr5:18075610-18079988 REVERSE ||| Symbols: NRAMP5, ATNRAMP5 | NRAMP5; inorganic anion transmembrane transporter/ metal ion transmembra…
PS	9	64	1.06095	0.690345	AT2G05100, AT1G33785, AT3G16250, AT3G14130, AT4G32520, AT1G56190, AT3G04790, AT1G73110, AT4G20130, AT1G01220, AT3G53520, AT5G66280, AT3G14790, AT1G79500, AT3G07330, AT1G23480, AT2G21770, AT5G44030, AT4G24010, AT5G05170, AT3G29810, AT2G15350, AT5G25310, AT4G01220, AT5G14380, AT5G55730, AT5G60490, AT4G14900, AT1G23460, AT2G43890, AT1G19170, AT3G27400, AT3G61490, AT1G23470, AT2G36870, AT5G39310, AT5…	Symbols: LHCB2.1, LHCB2 | LHCB2.1; chlorophyll binding | chr2:1823240-1824425 REVERSE ||| Cytochrome B6, pseudogene, similar to Cytochrome B6. (Mouse-ear cress) {Arabidopsis thaliana}; blastp match of 61% identity and 7.1e-17 P-value to GP|2959637|gb|AAC05628.1||AF001491 cytochrome b6 {Prochlorococcus marinus str. MIT 9303} | chr1:12255360-12256256 REVERSE ||| Symbols: NDF4 | NDF4 (NDH-DEPENDENT …
signalling.receptor kinases.proline extensin like	2	12	1.29664	0.690345	AT1G49270, AT4G32710	protein kinase family protein | chr1:18227334-18230227 REVERSE ||| ATP binding / kinase/ protein kinase/ protein serine/threonine kinase/ protein tyrosine kinase | chr4:15781045-15783461 FORWARD
hormone metabolism.abscisic acid	3	20	1.14405	0.691829	AT3G43600, AT1G52340, AT5G53820	Symbols: AAO2 | AAO2 (ALDEHYDE OXIDASE 2); aldehyde oxidase | chr3:15512607-15517506 REVERSE ||| Symbols: ABA2, SIS4, GIN1, SDR1, ISI4, SRE1, ATABA2, ATSDR1 | ABA2 (ABA DEFICIENT 2); alcohol dehydrogenase/ oxidoreductase/ xanthoxin dehydrogenase | chr1:19489794-19491648 REVERSE ||| unknown protein | chr5:21853397-21854117 FORWARD
protein.synthesis.ribosomal protein.prokaryotic.chloroplast.50S subunit	3	20	1.14405	0.691829	AT3G25920, AT2G16930, AT5G40950	Symbols: RPL15 | RPL15; structural constituent of ribosome | chr3:9491055-9492635 REVERSE ||| ribosomal protein L27 family protein | chr2:7341120-7342302 FORWARD ||| Symbols: RPL27 | RPL27 (RIBOSOMAL PROTEIN LARGE SUBUNIT 27); structural constituent of ribosome | chr5:16410782-16412063 FORWARD
signalling.in sugar and nutrient physiology	3	20	1.14405	0.691829	AT5G52390, AT5G11180, AT3G29160	photoassimilate-responsive protein, putative | chr5:21263936-21265264 REVERSE ||| Symbols: ATGLR2.6, GLR2.6 | ATGLR2.6; intracellular ligand-gated ion channel | chr5:3557261-3561575 REVERSE ||| Symbols: AKIN11, SnRK1.2, KIN11 | AKIN11 (Arabidopsis SNF1 kinase homolog 11); protein binding / protein kinase | chr3:11128625-11132065 REVERSE
cell.cycle	10	73	1.02903	0.69896	AT4G19560, AT1G70620, AT2G16600, AT1G20610, AT3G50630, AT3G05480, AT5G41770, AT3G21481, AT1G26940, AT4G33060	Symbols: CYCT1;2 | CYCT1;2; cyclin-dependent protein kinase | chr4:10661428-10664716 FORWARD ||| cyclin-related | chr1:26626566-26631104 FORWARD ||| Symbols: ROC3 | ROC3; peptidyl-prolyl cis-trans isomerase | chr2:7200807-7201574 FORWARD ||| Symbols: CYCB2;3 | CYCB2;3 (Cyclin B2;3); cyclin-dependent protein kinase regulator | chr1:7134790-7137781 REVERSE ||| Symbols: KRP2, ICK2 | KRP2 (KIP-RELATE…
lipid metabolism.FA synthesis and FA elongation.acyl coa ligase	2	13	1.17869	0.712772	AT1G30520, AT5G36880	Symbols: AAE14 | AAE14 (Acyl-Activating Enzyme 14); AMP binding / o-succinylbenzoate-CoA ligase | chr1:10810984-10813700 FORWARD ||| acetyl-CoA synthetase, putative / acetate-CoA ligase, putative | chr5:14534613-14540299 REVERSE
Biodegradation of Xenobiotics	2	13	1.17869	0.712772	AT2G31350, AT2G43430	Symbols: GLX2-5 | GLX2-5 (GLYOXALASE 2-5); hydroxyacylglutathione hydrolase/ iron ion binding / zinc ion binding | chr2:13368292-13371057 FORWARD ||| Symbols: GLX2-1, GLY1 | GLX2-1 (GLYOXALASE 2-1); hydroxyacylglutathione hydrolase | chr2:18035369-18038255 REVERSE
RNA.regulation of transcription.HDA	2	13	1.17869	0.712772	AT3G18520, AT3G44660	Symbols: HDA15, ATHDA15 | HDA15; histone deacetylase | chr3:6361176-6365615 FORWARD ||| Symbols: hda10 | hda10 (histone deacetylase 10); histone deacetylase | chr3:16214964-16215785 REVERSE
RNA.regulation of transcription.Zn-finger(CCHC)	2	13	1.17869	0.712772	AT3G24070, AT3G43590	zinc knuckle (CCHC-type) family protein | chr3:8693085-8694709 FORWARD ||| zinc knuckle (CCHC-type) family protein | chr3:15509621-15512574 FORWARD
protein.synthesis.transfer RNA.nucleus.tRNA-Asp	2	13	1.17869	0.712772	AT5G40545, AT5G05945	pre-tRNA | chr5:16239638-16239709 REVERSE ||| pre-tRNA | chr5:1788651-1788722 FORWARD
protein.postranslational modification.kinase	10	74	1.01288	0.71394	AT2G22560, AT5G66210, AT3G48190, AT5G37790, AT3G07070, AT1G26970, AT1G20650, AT2G19410, AT1G16760, AT3G20200	FUNCTIONS IN: molecular_function unknown; INVOLVED IN: biological_process unknown; LOCATED IN: plasma membrane; EXPRESSED IN: 15 plant structures; EXPRESSED DURING: 6 growth stages; CONTAINS InterPro DOMAIN/s: KIP1-like (InterPro:IPR011684); BEST Arabidopsis thaliana protein match is: kinase interacting family protein (TAIR:AT5G10500.1); Has 47807 Blast hits to 30104 proteins in 1314 species: Arc…
hormone metabolism.brassinosteroid	3	21	1.08047	0.7233	AT2G16530, AT5G24140, AT2G22830	3-oxo-5-alpha-steroid 4-dehydrogenase family protein / steroid 5-alpha-reductase family protein | chr2:7162989-7165323 REVERSE ||| Symbols: SQP2 | SQP2; FAD binding / oxidoreductase/ squalene monooxygenase | chr5:8164347-8167673 REVERSE ||| Symbols: SQE2 | SQE2 (squalene epoxidase 2); FAD binding / oxidoreductase/ squalene monooxygenase | chr2:9723680-9726270 REVERSE
signalling.in sugar and nutrient physiology	3	21	1.08047	0.7233	AT5G52390, AT5G11180, AT3G29160, AT1G80010, AT5G48800, AT2G47860, AT3G22380, AT2G47590, AT4G12850, AT1G67900, AT2G32250, AT3G59470, AT1G51790, AT5G28490, AT2G26990	photoassimilate-responsive protein, putative | chr5:21263936-21265264 REVERSE ||| Symbols: ATGLR2.6, GLR2.6 | ATGLR2.6; intracellular ligand-gated ion channel | chr5:3557261-3561575 REVERSE ||| Symbols: AKIN11, SnRK1.2, KIN11 | AKIN11 (Arabidopsis SNF1 kinase homolog 11); protein binding / protein kinase | chr3:11128625-11132065 REVERSE ||| Symbols: FRS8 | FRS8 (FAR1-related sequence 8); zinc ion…
not assigned.no ontology.pentatricopeptide (PPR) repeat-containing protein	43	327	0.981087	0.728476	AT4G39530, AT2G27800, AT1G05750, AT4G17616, AT5G40410, AT5G15010, AT3G13770, AT2G15820, AT1G11710, AT4G20740, AT1G23450, AT1G10910, AT1G77010, AT4G04790, AT2G48000, AT1G51965, AT1G71210, AT3G18840, AT5G55840, AT4G28010, AT2G03380, AT5G27270, AT5G10690, AT1G10330, AT5G50390, AT5G39350, AT1G31840, AT1G74600, AT5G57250, AT1G77405, AT4G01400, AT2G31400, AT2G37230, AT1G11290, AT1G34160, AT5G08310, AT2…	pentatricopeptide (PPR) repeat-containing protein | chr4:18374736-18377240 REVERSE ||| CONTAINS InterPro DOMAIN/s: Pentatricopeptide repeat (InterPro:IPR002885); BEST Arabidopsis thaliana protein match is: unknown protein (TAIR:AT5G27300.1); Has 11283 Blast hits to 3897 proteins in 129 species: Archae - 1; Bacteria - 2; Metazoa - 118; Fungi - 74; Plants - 10832; Viruses - 0; Other Eukaryotes - 25…
protein.degradation.ubiquitin.E3.RING	30	229	0.976895	0.728476	AT1G22510, AT5G62460, AT5G37280, AT4G03510, AT2G17730, AT3G48070, AT1G27910, AT4G03965, AT2G25360, AT1G22500, AT4G01023, AT5G42940, AT4G26400, AT1G45180, AT5G40140, AT1G03370, AT3G27330, AT4G17910, AT3G60300, AT1G59560, AT1G61620, AT4G32600, AT5G03180, AT4G12140, AT2G15530, AT1G43860, AT4G08590, AT2G01275, AT1G77770, AT4G07869	zinc finger (C3HC4-type RING finger) family protein | chr1:7950819-7952673 REVERSE ||| zinc finger (C3HC4-type RING finger) family protein | chr5:25074883-25077294 FORWARD ||| zinc finger (C3HC4-type RING finger) family protein | chr5:14761275-14761925 REVERSE ||| Symbols: RMA1 | RMA1; protein binding / ubiquitin-protein ligase/ zinc ion binding | chr4:1557120-1559428 REVERSE ||| zinc finger (C3H…
signalling.calcium	15	114	0.982014	0.728476	AT5G54490, AT3G10300, AT2G38800, AT2G32450, AT1G50700, AT4G12860, AT3G20290, AT4G17615, AT5G28830, AT5G66210, AT5G62390, AT5G37770, AT1G51960, AT2G22950, AT5G10680	Symbols: PBP1 | PBP1 (PINOID-BINDING PROTEIN 1); calcium ion binding / protein binding | chr5:22121404-22121931 FORWARD ||| calcium-binding EF hand family protein | chr3:3186321-3188301 FORWARD ||| calmodulin-binding protein-related | chr2:16216999-16219159 FORWARD ||| calcium-binding EF hand family protein | chr2:13778449-13781258 FORWARD ||| Symbols: CPK33 | CPK33; ATP binding / calcium ion bin…
cell wall.cell wall proteins.AGPs	3	22	1.02351	0.728476	AT5G14380, AT5G55730, AT5G60490	Symbols: AGP6 | AGP6 (Arabinogalactan proteins 6) | chr5:4635797-4636676 REVERSE ||| Symbols: FLA1 | FLA1 (FASCICLIN-LIKE ARAB INOGALACTAN 1) | chr5:22558148-22560461 REVERSE ||| Symbols: FLA12 | FLA12 | chr5:24325727-24326702 REVERSE
protein.glycosylation	3	22	1.02351	0.728476	AT3G04240, AT4G38240, AT3G19280	Symbols: SEC | SEC (secret agent); transferase, transferring glycosyl groups | chr3:1113934-1120872 REVERSE ||| Symbols: CGL1, CGL, GNTI | CGL1 (COMPLEX GLYCAN LESS 1); alpha-1,3-mannosylglycoprotein 2-beta-N-acetylglucosaminyltransferase/ protein N-acetylglucosaminyltransferase/ transferase, transferring glycosyl groups | chr4:17931570-17935325 REVERSE ||| Symbols: FUT11, ATFUT11, FUCT1, FUCTA |…
signalling.receptor kinases.leucine rich repeat III	3	22	1.02351	0.728476	AT2G27060, AT1G67510, AT1G10850	ATP binding / protein binding / protein kinase/ protein serine/threonine kinase/ protein tyrosine kinase | chr2:11551041-11554775 FORWARD ||| leucine-rich repeat family protein | chr1:25297477-25300184 REVERSE ||| ATP binding / protein binding / protein kinase/ protein serine/threonine kinase | chr1:3611747-3614613 FORWARD
major CHO metabolism.degradation.starch	2	14	1.08043	0.728476	AT3G23640, AT3G46970	Symbols: HGL1 | HGL1 (heteroglycan glucosidase 1); hydrolase, hydrolyzing O-glycosyl compounds | chr3:8501813-8509584 FORWARD ||| Symbols: ATPHS2, PHS2 | PHS2 (ALPHA-GLUCAN PHOSPHORYLASE 2); phosphorylase/ transferase, transferring glycosyl groups | chr3:17301394-17306446 REVERSE
transport.phosphate	2	14	1.08043	0.728476	AT3G46980, AT3G26570	Symbols: PHT4;3 | transporter-related | chr3:17307055-17309938 REVERSE ||| Symbols: PHT2;1, ORF02 | PHT2;1 (PHOSPHATE TRANSPORTER 2;1); low affinity phosphate transmembrane transporter | chr3:9756225-9758633 FORWARD
signalling.MAP kinases	4	30	0.997235	0.730271	AT4G01370, AT5G41990, AT3G13530, AT1G59580	Symbols: ATMPK4, MPK4 | ATMPK4 (ARABIDOPSIS THALIANA MAP KINASE 4); MAP kinase/ kinase | chr4:567095-569088 FORWARD ||| Symbols: WNK8, ATWNK8 | WNK8 (WITH NO LYSINE (K) KINASE 8); kinase/ protein kinase | chr5:16794967-16798006 REVERSE ||| Symbols: MAPKKK7, MAP3KE1 | MAPKKK7; ATP binding / binding / kinase/ protein kinase/ protein serine/threonine kinase/ protein tyrosine kinase | chr3:4411688-44…
transport.potassium	4	30	0.997235	0.730271	AT5G14880, AT4G00630, AT1G60160, AT4G01840	potassium transporter, putative | chr5:4814244-4817667 FORWARD ||| Symbols: KEA2, ATKEA2 | KEA2; potassium ion transmembrane transporter/ potassium:hydrogen antiporter | chr4:261531-268050 REVERSE ||| potassium transporter family protein | chr1:22188114-22191395 REVERSE ||| Symbols: KCO5, ATTPK5, ATKCO5, TPK5 | KCO5 (CA2+ ACTIVATED OUTWARD RECTIFYING K+ CHANNEL 5); outward rectifier potassium cha…
hormone metabolism.auxin.induced-regulated-responsive-activated	5	38	0.982092	0.733911	AT1G48660, AT1G29490, AT2G33310, AT2G34680, AT5G64600	auxin-responsive GH3 family protein | chr1:17995948-17997972 REVERSE ||| auxin-responsive family protein | chr1:10319744-10320402 FORWARD ||| Symbols: IAA13 | IAA13; transcription factor | chr2:14114281-14115969 REVERSE ||| Symbols: AIR9 | AIR9; protein binding | chr2:14616622-14629129 REVERSE ||| unknown protein | chr5:25825167-25828185 FORWARD
cell wall.degradation.pectate lyases and polygalacturonases	6	46	0.972236	0.736046	AT1G23460, AT2G43890, AT1G19170, AT3G27400, AT3G61490, AT1G23470	polygalacturonase | chr1:8327312-8329622 FORWARD ||| polygalacturonase, putative / pectinase, putative | chr2:18176924-18178390 FORWARD ||| glycoside hydrolase family 28 protein / polygalacturonase (pectinase) family protein | chr1:6616643-6618986 FORWARD ||| pectate lyase family protein | chr3:10140323-10143225 FORWARD ||| glycoside hydrolase family 28 protein / polygalacturonase (pectinase) fam…
RNA.regulation of transcription.bHLH,Basic Helix-Loop-Helix family	6	46	0.972236	0.736046	AT3G23690, AT5G50915, AT1G68920, AT1G06150, AT5G09750, AT1G06149, AT1G64280, AT5G23405, AT3G19380, AT5G04290, AT1G02080, AT2G25640, AT1G56110, AT1G03530, AT5G60170, AT3G17450, AT3G24870, AT1G51540, AT3G20280, AT3G43240, AT4G11560, AT5G19490, AT3G02400, AT4G01960, AT1G59453, AT1G59890, AT5G25520, AT5G47430, AT1G26760, AT1G05830, AT1G73100, AT2G35160	basic helix-loop-helix (bHLH) family protein | chr3:8528632-8531012 REVERSE ||| basic helix-loop-helix (bHLH) family protein | chr5:20710209-20712315 REVERSE ||| basic helix-loop-helix (bHLH) family protein | chr1:25915012-25917906 FORWARD ||| transcription factor | chr1:1868987-1873718 REVERSE ||| Symbols: HEC3 | HEC3 (HECATE 3); DNA binding / transcription factor | chr5:3026401-3027075 REVERSE …
redox.thioredoxin	4	31	0.960235	0.755285	AT4G08930, AT3G54960, AT2G17420, AT2G01270	Symbols: ATAPRL6 | ATAPRL6 (APR-like 6) | chr4:5729192-5730850 FORWARD ||| Symbols: ATPDIL1-3, PDI1, ATPDI1 | ATPDIL1-3 (PDI-LIKE 1-3); protein disulfide isomerase | chr3:20363310-20366840 REVERSE ||| Symbols: NTRA, ATNTRA, NTR2 | NTRA (NADPH-DEPENDENT THIOREDOXIN REDUCTASE A); thioredoxin-disulfide reductase | chr2:7564345-7566539 FORWARD ||| Symbols: AtQSOX2 | AtQSOX2 (quiescin-sulfhydryl oxida…
protein.postranslational modification.kinase.receptor like cytoplasmatic kinase VII	3	23	0.972273	0.755285	AT3G07070, AT1G26970, AT1G20650	protein kinase family protein | chr3:2237958-2240074 FORWARD ||| protein kinase, putative | chr1:9359682-9361833 FORWARD ||| ATP binding / protein kinase/ protein serine/threonine kinase | chr1:7158244-7160526 REVERSE
transport.amino acids	3	23	0.972273	0.755285	AT3G54830, AT3G13620, AT3G55740	amino acid transporter family protein | chr3:20311901-20315030 REVERSE ||| amino acid permease family protein | chr3:4450745-4452624 REVERSE ||| Symbols: PROT2, ATPROT2 | PROT2 (PROLINE TRANSPORTER 2); L-proline transmembrane transporter/ amino acid transmembrane transporter | chr3:20695499-20698265 FORWARD
signalling.receptor kinases	2	15	0.997237	0.759461	AT1G53430, AT1G56145	leucine-rich repeat family protein / protein kinase family protein | chr1:19935167-19941088 FORWARD ||| leucine-rich repeat family protein / protein kinase family protein | chr1:21008093-21014012 REVERSE
misc.beta 1,3 glucan hydrolases	5	40	0.92584	0.762863	AT1G18650, AT1G62095, AT1G66250, AT3G07320, AT1G32860	Symbols: PDCB3 | PDCB3 (PLASMODESMATA CALLOSE-BINDING PROTEIN 3); callose binding / polysaccharide binding | chr1:6418858-6420557 REVERSE ||| Pseudogene of AT1G11820; hydrolase, hydrolyzing O-glycosyl compounds | chr1:22955926-22956483 REVERSEweakly similar to ( 130)AT1G11820hydrolase, hydrolyzing O-glycosyl compounds | chr1:3991258-3993326 REVERSE ||| glycosyl hydrolase family 17 protein | chr1:…
nucleotide metabolism.synthesis	2	16	0.925937	0.781513	AT3G55010, AT4G18440	Symbols: ATPURM, PUR5 | PUR5; ATP binding / phosphoribosylformylglycinamidine cyclo-ligase | chr3:20386619-20388806 FORWARD ||| adenylosuccinate lyase, putative / adenylosuccinase, putative | chr4:10186131-10188909 REVERSE
nucleotide metabolism.degradation	3	25	0.883745	0.800556	AT5G18280, AT4G29580, AT5G09290	Symbols: ATAPY2, APY2 | ATAPY2 (ARABIDOPSIS THALIANA APYRASE 2); ATPase/ nucleotide diphosphatase | chr5:6050514-6054875 REVERSE ||| cytidine deaminase, putative / cytidine aminohydrolase, putative | chr4:14510147-14512186 FORWARD ||| 3(2),5-bisphosphate nucleotidase, putative / inositol polyphosphate 1-phosphatase, putative | chr5:2882427-2884229 FORWARD
RNA.transcription	7	58	0.88934	0.803958	AT2G19910, AT5G15700, AT3G18090, AT5G24120, AT4G20330, AT3G22590, AT1G03280	RNA-dependent RNA polymerase family protein | chr2:8595820-8600757 REVERSE ||| DNA-directed RNA polymerase (RPOT2) | chr5:5115300-5121840 REVERSE ||| Symbols: NRPD2B | NRPD2b; DNA binding / DNA-directed RNA polymerase/ ribonucleoside binding | chr3:6194997-6200237 FORWARD ||| Symbols: SIGE, SIG5, ATSIG5 | SIGE (SIGMA FACTOR E); DNA binding / DNA-directed RNA polymerase/ sigma factor/ transcriptio…
glycolysis	5	42	0.875722	0.80541	AT5G42740, AT1G07110, AT4G26520, AT2G36530, AT3G22960	glucose-6-phosphate isomerase, cytosolic (PGIC) | chr5:17135692-17140892 FORWARD ||| Symbols: F2KP, ATF2KP, FKFBP | F2KP (FRUCTOSE-2,6-BISPHOSPHATASE); fructose-2,6-bisphosphate 2-phosphatase | chr1:2178104-2184148 REVERSE ||| fructose-bisphosphate aldolase, cytoplasmic | chr4:13388386-13390374 FORWARD ||| Symbols: LOS2 | LOS2; copper ion binding / phosphopyruvate hydratase | chr2:15320756-153238…
misc.glutathione S transferases	2	17	0.86419	0.805414	AT3G09270, AT1G74590	Symbols: ATGSTU8 | ATGSTU8 (GLUTATHIONE S-TRANSFERASE TAU 8); glutathione transferase | chr3:2848289-2849289 REVERSE ||| Symbols: ATGSTU10, GSTU10 | GSTU10 (GLUTATHIONE S-TRANSFERASE TAU 10); glutathione transferase | chr1:28023627-28024726 REVERSE
stress.abiotic.heat	11	92	0.879684	0.822774	AT4G16550, AT5G42020, AT1G28210, AT3G09440, AT1G77020, AT4G11660, AT4G07990, AT3G10680, AT1G79940, AT2G35720, AT2G04030	heat shock protein-related | chr4:9318442-9324254 REVERSE ||| Symbols: BIP, BIP2 | BIP2; ATP binding | chr5:16807483-16810646 REVERSE ||| Symbols: ATJ1 | ATJ1; heat shock protein binding / nucleic acid binding / unfolded protein binding / zinc ion binding | chr1:9854546-9860158 FORWARD ||| heat shock cognate 70 kDa protein 3 (HSC70-3) (HSP70-3) | chr3:2903199-2905724 REVERSE ||| DNAJ heat shock N…
not assigned.no ontology.glycine rich proteins	6	52	0.845107	0.826404	AT2G26120, AT4G37900, AT4G32920, AT1G27695, AT1G15280, AT5G01170	glycine-rich protein | chr2:11123430-11123817 FORWARD ||| glycine-rich protein | chr4:17821737-17824627 REVERSE ||| glycine-rich protein | chr4:15887575-15896006 REVERSE ||| glycine-rich protein | chr1:9639024-9640151 FORWARD ||| glycine-rich protein | chr1:5252317-5256751 FORWARD ||| glycine-rich protein | chr5:58162-60136 FORWARD
metal handling	4	35	0.836131	0.826404	AT5G23990, AT2G36880, AT1G78330, AT3G02960	Symbols: ATFRO5, FRO5 | FRO5 (FERRIC REDUCTION OXIDASE 5); ferric-chelate reductase | chr5:8105565-8108590 REVERSE ||| Symbols: MAT3 | MAT3 (methionine adenosyltransferase 3); copper ion binding / methionine adenosyltransferase | chr2:15479366-15481412 REVERSE ||| pseudogene, putative serine acetyltransferase, blastp match of 78% identity and 4.2e-32 P-value to GP|22758278|gb|AAN05506.1||AC099399…
lipid metabolism.lipid degradation.lysophospholipases	3	27	0.81002	0.826404	AT1G31480, AT1G52570, AT5G55480	Symbols: SGR2 | SGR2 (SHOOT GRAVITROPISM 2); phospholipase A1 | chr1:11265880-11271701 FORWARD ||| Symbols: PLDALPHA2 | PLDALPHA2 (phosphlipase d alpha 2); phospholipase D | chr1:19583940-19586551 REVERSE ||| Symbols: SVL1 | SVL1 (SHV3-LIKE 1); glycerophosphodiester phosphodiesterase/ phosphoric diester hydrolase | chr5:22474230-22478132 FORWARD
misc.GDSL-motif lipase	3	27	0.81002	0.826404	AT5G37690, AT3G43570, AT1G53940	GDSL-motif lipase/hydrolase family protein | chr5:14973353-14976169 REVERSE ||| GDSL-motif lipase, putative | chr3:15473345-15474765 FORWARD ||| Symbols: GLIP2 | GLIP2; arylesterase/ carboxylesterase/ lipase | chr1:20143279-20145780 FORWARD
major CHO metabolism.synthesis.starch	2	18	0.810102	0.826404	AT2G36390, AT2G39930	Symbols: SBE2.1, BE3 | SBE2.1 (starch branching enzyme 2.1); 1,4-alpha-glucan branching enzyme | chr2:15264237-15270092 FORWARD ||| Symbols: ISA1, ATISA1 | ISA1 (ISOAMYLASE 1); alpha-amylase/ isoamylase | chr2:16666023-16672494 FORWARD
cell wall.modification	2	18	0.810102	0.826404	AT2G36870, AT5G39310	xyloglucan:xyloglucosyl transferase, putative / xyloglucan endotransglycosylase, putative / endo-xyloglucan transferase, putative | chr2:15472645-15474681 REVERSE ||| Symbols: ATEXPA24, EXP24, ATEXP24, ATHEXP ALPHA 1.19 | ATEXPA24 (ARABIDOPSIS THALIANA EXPANSIN A24) | chr5:15739280-15740514 REVERSE
signalling.receptor kinases.leucine rich repeat XI	2	18	0.810102	0.826404	AT1G34110, AT1G72180	leucine-rich repeat transmembrane protein kinase, putative | chr1:12417176-12421189 REVERSE ||| leucine-rich repeat transmembrane protein kinase, putative | chr1:27162820-27167430 FORWARD
stress.abiotic.drought/salt	4	36	0.809938	0.827376	AT3G21620, AT5G49230, AT4G14360, AT1G26850	early-responsive to dehydration protein-related / ERD protein-related | chr3:7610958-7614461 REVERSE ||| Symbols: HRB1 | HRB1 (HYPERSENSITIVE TO RED AND BLUE); protein binding | chr5:19958873-19960544 REVERSE ||| dehydration-responsive protein-related | chr4:8267660-8271121 REVERSE ||| dehydration-responsive family protein | chr1:9300873-9304139 REVERSE
stress.abiotic	24	199	0.887781	0.836755	AT2G28790, AT4G16550, AT5G42020, AT1G28210, AT3G09440, AT1G77020, AT4G11660, AT4G07990, AT3G10680, AT1G79940, AT2G35720, AT2G04030, AT5G52310, AT3G21620, AT5G49230, AT4G14360, AT1G26850, AT4G10270, AT4G02260, AT5G17390, AT3G48450, AT1G44760, AT5G61750, AT5G39120	osmotin-like protein, putative | chr2:12354430-12355431 REVERSE ||| heat shock protein-related | chr4:9318442-9324254 REVERSE ||| Symbols: BIP, BIP2 | BIP2; ATP binding | chr5:16807483-16810646 REVERSE ||| Symbols: ATJ1 | ATJ1; heat shock protein binding / nucleic acid binding / unfolded protein binding / zinc ion binding | chr1:9854546-9860158 FORWARD ||| heat shock cognate 70 kDa protein 3 (HSC…
protein.synthesis.ribosomal protein.eukaryotic.40S subunit	3	28	0.777569	0.840089	AT3G45030, AT5G03850, AT3G04770	40S ribosomal protein S20 (RPS20A) | chr3:16471386-16472393 REVERSE ||| 40S ribosomal protein S28 (RPS28B) | chr5:1028340-1029121 REVERSE ||| Symbols: RPSAb | RPSAb (40S ribosomal protein SA B); structural constituent of ribosome | chr3:1309294-1310887 REVERSE
misc.short chain dehydrogenase/reductase (SDR)	2	19	0.762401	0.840089	AT4G20760, AT4G11410	short-chain dehydrogenase/reductase (SDR) family protein | chr4:11129015-11130770 FORWARD ||| short-chain dehydrogenase/reductase (SDR) family protein | chr4:6944918-6947333 REVERSE
protein.synthesis.initiation	6	54	0.809773	0.841786	AT5G38640, AT4G11160, AT3G56150, AT5G35620, AT3G55620, AT2G45730	eukaryotic translation initiation factor 2B family protein / eIF-2B family protein | chr5:15467679-15470724 REVERSE ||| translation initiation factor IF-2, mitochondrial, putative | chr4:6803594-6806875 FORWARD ||| Symbols: EIF3C, ATEIF3C-1, EIF3C-1, ATTIF3C1, TIF3C1 | EIF3C (EUKARYOTIC TRANSLATION INITIATION FACTOR 3C); translation initiation factor | chr3:20833584-20837157 REVERSE ||| Symbols: …
transport.ABC transporters and multidrug resistance systems	7	63	0.809691	0.84439	AT5G19410, AT1G53270, AT4G25750, AT2G41700, AT4G15230, AT4G15215, AT3G28345	ABC transporter family protein | chr5:6545237-6547111 REVERSE ||| ABC transporter family protein | chr1:19862878-19864650 FORWARD ||| ABC transporter family protein | chr4:13110627-13112360 REVERSE ||| ATPase, coupled to transmembrane movement of substances / amino acid transmembrane transporter | chr2:17383042-17396110 REVERSE ||| Symbols: ATPDR2, PDR2 | PDR2 (PLEIOTROPIC DRUG RESISTANCE 2); ATP…
stress.abiotic.unspecified	5	46	0.790051	0.84439	AT5G17390, AT3G48450, AT1G44760, AT5G61750, AT5G39120	universal stress protein (USP) family protein | chr5:5727640-5728688 FORWARD ||| nitrate-responsive NOI protein, putative | chr3:17944029-17944888 REVERSE ||| universal stress protein (USP) family protein | chr1:16896686-16898612 REVERSE ||| cupin family protein | chr5:24812804-24813436 REVERSE ||| germin-like protein, putative | chr5:15662705-15663486 REVERSE
TCA / org. transformation.other organic acid transformaitons	1	10	0.72012	0.84439	AT2G13560	malate oxidoreductase, putative | chr2:5649964-5655320 FORWARD
mitochondrial electron transport / ATP synthesis.cytochrome c oxidase	1	10	0.72012	0.84439	AT3G08950	electron transport SCO1/SenC family protein | chr3:2727215-2729601 FORWARD
hormone metabolism.cytokinin	1	10	0.72012	0.84439	AT2G17820	Symbols: ATHK1, AHK1 | ATHK1 (histidine kinase 1); histidine phosphotransfer kinase/ osmosensor/ protein histidine kinase | chr2:7742924-7748220 REVERSE
redox.ascorbate and glutathione.ascorbate	1	10	0.72012	0.84439	AT4G33670	L-galactose dehydrogenase (L-GalDH) | chr4:16169523-16171561 REVERSE
misc.dynamin	1	10	0.72012	0.84439	AT3G19720	Symbols: ARC5 | ARC5 (ACCUMULATION AND REPLICATION OF CHLOROPLAST 5); GTP binding / GTPase | chr3:6850371-6855513 REVERSE
RNA.regulation of transcription.MYB-related transcription factor family	1	10	0.72012	0.84439	AT5G23650	myb family transcription factor | chr5:7969812-7971019 FORWARD
protein.synthesis.ribosomal protein.unknown	1	10	0.72012	0.84439	AT3G49080	ribosomal protein S9 family protein | chr3:18194154-18196727 REVERSE
not assigned.no ontology.Toll-Interleukin-Resistance (TIR) domain-containing protein	1	10	0.72012	0.84439	AT2G03030	Toll-Interleukin-Resistance (TIR) domain-containing protein | chr2:889764-890520 FORWARD
protein.folding	3	29	0.747614	0.845311	AT5G17710, AT2G33210, AT3G12340	Symbols: EMB1241 | EMB1241 (embryo defective 1241); adenyl-nucleotide exchange factor/ chaperone binding / protein binding / protein homodimerization | chr5:5839343-5841728 REVERSE ||| Symbols: HSP60-2 | HSP60-2 (HEAT SHOCK PROTEIN 60-2); ATP binding | chr2:14074907-14078731 REVERSE ||| FK506 binding / peptidyl-prolyl cis-trans isomerase | chr3:3925526-3929405 REVERSE
cell wall.degradation	6	57	0.761989	0.865386	AT1G23460, AT2G43890, AT1G19170, AT3G27400, AT3G61490, AT1G23470	polygalacturonase | chr1:8327312-8329622 FORWARD ||| polygalacturonase, putative / pectinase, putative | chr2:18176924-18178390 FORWARD ||| glycoside hydrolase family 28 protein / polygalacturonase (pectinase) family protein | chr1:6616643-6618986 FORWARD ||| pectate lyase family protein | chr3:10140323-10143225 FORWARD ||| glycoside hydrolase family 28 protein / polygalacturonase (pectinase) fam…
protein.targeting.secretory pathway.unspecified	2	21	0.682061	0.865386	AT1G78720, AT1G48240	protein transport protein sec61, putative | chr1:29605629-29607510 FORWARD ||| Symbols: ATNPSN12, NPSN12 | ATNPSN12; protein transporter | chr1:17809007-17811895 REVERSE
glycolysis.plastid branch	1	11	0.648068	0.865386	AT3G22960	Symbols: PKP1, PKP-ALPHA | PKP-ALPHA; pyruvate kinase | chr3:8139235-8141985 FORWARD
cell wall.cell wall proteins.HRGP	1	11	0.648068	0.865386	AT4G14900	hydroxyproline-rich glycoprotein family protein | chr4:8521522-8523705 REVERSE
lipid metabolism.lipid degradation.lysophospholipases.phospholipase D	1	11	0.648068	0.865386	AT1G52570	Symbols: PLDALPHA2 | PLDALPHA2 (phosphlipase d alpha 2); phospholipase D | chr1:19583940-19586551 REVERSE
RNA.regulation of transcription.C2C2(Zn) DOF zinc finger family	1	11	0.648068	0.865386	AT4G21040, AT3G50890, AT3G09735	Dof-type zinc finger domain-containing protein | chr4:11234807-11235505 REVERSE ||| Symbols: AtHB28 | AtHB28 (ARABIDOPSIS THALIANA HOMEOBOX PROTEIN 28); DNA binding / transcription factor | chr3:18916166-18917328 FORWARD ||| DNA-binding S1FA family protein | chr3:2986626-2987969 REVERSE
RNA.regulation of transcription.HSF,Heat-shock transcription factor family	1	11	0.648068	0.865386	AT4G13980	Symbols: AT-HSFA5, HSFA5 | AT-HSFA5; DNA binding / transcription factor | chr4:8076980-8079314 REVERSE
not assigned.no ontology.paired amphipathic helix repeat-containing protein	1	11	0.648068	0.865386	AT1G70030	paired amphipathic helix repeat-containing protein | chr1:26378794-26380379 FORWARD
misc.protease inhibitor/seed storage/lipid transfer protein (LTP) family protein	4	40	0.719757	0.871423	AT5G56480, AT4G22520, AT4G12510, AT3G22600	protease inhibitor/seed storage/lipid transfer protein (LTP) family protein | chr5:22870326-22870817 REVERSE ||| protease inhibitor/seed storage/lipid transfer protein (LTP) family protein | chr4:11858614-11858970 FORWARD ||| protease inhibitor/seed storage/lipid transfer protein (LTP) family protein | chr4:7417236-7417803 REVERSE ||| protease inhibitor/seed storage/lipid transfer protein (LTP) f…
misc.invertase/pectin methylesterase inhibitor family protein	3	32	0.670144	0.882713	AT1G23205, AT5G46940, AT5G46950	invertase/pectin methylesterase inhibitor family protein | chr1:8233997-8234893 REVERSE ||| invertase/pectin methylesterase inhibitor family protein | chr5:19058168-19058814 REVERSE ||| invertase/pectin methylesterase inhibitor family protein | chr5:19059519-19060121 REVERSE
mitochondrial electron transport / ATP synthesis.NADH-DH.localisation not clear	1	12	0.589116	0.882713	AT1G16700	NADH-ubiquinone oxidoreductase 23 kDa subunit, mitochondrial, putative | chr1:5709725-5711902 FORWARD
amino acid metabolism.synthesis.serine-glycine-cysteine group	1	12	0.589116	0.882713	AT1G18640	Symbols: PSP | PSP (3-PHOSPHOSERINE PHOSPHATASE); phosphoserine phosphatase | chr1:6416357-6418690 REVERSE
hormone metabolism.jasmonate	1	12	0.589116	0.882713	AT1G60300	apical meristem formation protein-related | chr1:22229780-22230748 REVERSE
protein.synthesis.transfer RNA.nucleus.tRNA-Ala	1	12	0.589116	0.882713	AT3G28685, AT1G07100, AT2G17810, AT5G40945, AT3G30345, AT1G28870, AT1G28880, AT1G28850, AT1G28860, AT1G28890, AT1G28840, AT4G25585, AT4G11405	pre-tRNA | chr3:10752431-10752503 FORWARD ||| pre-tRNA | chr1:2177885-2177958 FORWARD ||| pre-tRNA | chr2:7742712-7742785 FORWARD ||| pre-tRNA | chr5:16410585-16410665 FORWARD ||| pre-tRNA | chr3:11959167-11959239 FORWARD ||| pre-tRNA | chr1:10099425-10099496 FORWARD ||| pre-tRNA | chr1:10099827-10099898 FORWARD ||| pre-tRNA | chr1:10098653-10098724 FORWARD ||| pre-tRNA | chr1:10099079-10099150 F…
transport.calcium	1	12	0.589116	0.882713	AT4G03560	Symbols: ATTPC1, TPC1, ATCCH1, FOU2 | ATTPC1 (TWO-PORE CHANNEL 1); calcium channel/ voltage-gated calcium channel | chr4:1580056-1585966 FORWARD
not assigned.no ontology.formin homology 2 domain-containing protein	1	12	0.589116	0.882713	AT1G49590	formin-binding protein-related | chr1:18354786-18356642 FORWARD
DNA.unspecified	20	179	0.813752	0.895636	AT3G31980, AT2G25355, AT3G21430, AT4G34490, AT5G07710, AT2G25170, AT2G07320, AT2G24170, AT3G42670, AT2G35270, AT1G79890, AT2G07630, AT3G50900, AT3G13610, AT2G32250, AT2G07620, AT2G48100, AT3G50100, AT1G22275, AT3G46960	transposable element gene | chr3:12972404-12976508 REVERSE ||| exonuclease-related | chr2:10801278-10803722 FORWARD ||| Symbols: ATALY3, ALY3 | DNA binding | chr3:7544628-7553579 REVERSE ||| Symbols: ATCAP1, CAP 1, CAP1 | ATCAP1 (ARABIDOPSIS THALIANA CYCLASE ASSOCIATED PROTEIN 1); actin binding | chr4:16484530-16487417 REVERSE ||| exonuclease family protein | chr5:2453135-2455546 FORWARD ||| Symb…
protein.degradation.AAA type	3	33	0.647763	0.895636	AT1G64110, AT4G02480, AT3G28610	AAA-type ATPase family protein | chr1:23796719-23801725 REVERSE ||| AAA-type ATPase family protein | chr4:1081759-1088846 REVERSE ||| ATP binding / ATPase/ nucleoside-triphosphatase/ nucleotide binding | chr3:10724990-10726414 FORWARD
OPP	1	13	0.539989	0.900384	AT3G04790	ribose 5-phosphate isomerase-related | chr3:1313316-1315243 FORWARD
secondary metabolism.flavonoids.anthocyanins	1	13	0.539989	0.900384	AT1G56650	Symbols: PAP1, MYB75, SIAA1, ATMYB75 | PAP1 (PRODUCTION OF ANTHOCYANIN PIGMENT 1); DNA binding / transcription factor | chr1:21233595-21235137 REVERSE
protein.synthesis.transfer RNA.nucleus.tRNA-Ser	1	13	0.539989	0.900384	AT4G25585	pre-tRNA | chr4:13058832-13058913 REVERSE
amino acid metabolism.synthesis.aromatic aa.tryptophan	1	14	0.498419	0.915974	AT2G04400	indole-3-glycerol phosphate synthase (IGPS) | chr2:1531148-1533737 FORWARD
nucleotide metabolism.phosphotransfer and pyrophosphatases	1	14	0.498419	0.915974	AT3G60961	ATP binding / nucleobase, nucleoside, nucleotide kinase | chr3:22541319-22552529 FORWARD
RNA.regulation of transcription.General Transcription	1	14	0.498419	0.915974	AT4G17020	transcription factor-related | chr4:9577776-9581392 REVERSE
not assigned.no ontology.pumilio/Puf RNA-binding domain-containing protein	1	14	0.498419	0.915974	AT4G08560	Symbols: APUM15 | APUM15 (Arabidopsis Pumilio 15); RNA binding / binding | chr4:5450434-5453183 FORWARD
protein.synthesis.transfer RNA.nucleus	20	184	0.788678	0.916532	AT3G28685, AT1G36350, AT3G50895, AT5G40545, AT5G05945, AT1G63510, AT4G14345, AT1G07100, AT2G17810, AT5G40945, AT3G30345, AT1G28870, AT1G28880, AT1G28850, AT1G28860, AT1G28890, AT1G28840, AT4G25585, AT4G11405, AT2G03790	pre-tRNA | chr3:10752431-10752503 FORWARD ||| pre-tRNA | chr1:13686426-13686498 FORWARD ||| pre-tRNA | chr3:18917433-18917506 FORWARD ||| pre-tRNA | chr5:16239638-16239709 REVERSE ||| pre-tRNA | chr5:1788651-1788722 FORWARD ||| pre-tRNA | chr1:23559187-23559258 REVERSE ||| pre-tRNA | chr4:8255700-8255771 FORWARD ||| pre-tRNA | chr1:2177885-2177958 FORWARD ||| pre-tRNA | chr2:7742712-7742785 FORWA…
protein.synthesis.transfer RNA	20	185	0.783845	0.921095	AT3G28685, AT1G36350, AT3G50895, AT5G40545, AT5G05945, AT1G63510, AT4G14345, AT1G07100, AT2G17810, AT5G40945, AT3G30345, AT1G28870, AT1G28880, AT1G28850, AT1G28860, AT1G28890, AT1G28840, AT4G25585, AT4G11405, AT2G03790	pre-tRNA | chr3:10752431-10752503 FORWARD ||| pre-tRNA | chr1:13686426-13686498 FORWARD ||| pre-tRNA | chr3:18917433-18917506 FORWARD ||| pre-tRNA | chr5:16239638-16239709 REVERSE ||| pre-tRNA | chr5:1788651-1788722 FORWARD ||| pre-tRNA | chr1:23559187-23559258 REVERSE ||| pre-tRNA | chr4:8255700-8255771 FORWARD ||| pre-tRNA | chr1:2177885-2177958 FORWARD ||| pre-tRNA | chr2:7742712-7742785 FORWA…
redox.ascorbate and glutathione	2	26	0.53979	0.922026	AT5G38630, AT4G33670	Symbols: ACYB-1 | ACYB-1; carbon-monoxide oxygenase | chr5:15465992-15468185 FORWARD ||| L-galactose dehydrogenase (L-GalDH) | chr4:16169523-16171561 REVERSE
redox.glutaredoxins	1	15	0.462787	0.922026	AT1G32760	glutaredoxin family protein | chr1:11858211-11859292 FORWARD
protein.synthesis.transfer RNA.nucleus.tRNA-Leu	1	15	0.462787	0.922026	AT5G40945	pre-tRNA | chr5:16410585-16410665 FORWARD
protein.synthesis.transfer RNA.nucleus.tRNA-Val	1	15	0.462787	0.922026	AT2G03790	pre-tRNA | chr2:1154385-1154457 FORWARD
signalling.misc	1	15	0.462787	0.922026	AT1G48050	Symbols: KU80, ATKU80 | KU80; double-stranded DNA binding / protein binding | chr1:17723452-17727043 FORWARD
transport.metabolite transporters at the envelope membrane	1	15	0.462787	0.922026	AT1G48230	phosphate translocator-related | chr1:17806264-17808885 FORWARD
amino acid metabolism.synthesis.aromatic aa	2	27	0.518164	0.929787	AT3G29200, AT2G04400	Symbols: CM1, ATCM1 | CM1 (CHORISMATE MUTASE 1); L-ascorbate peroxidase/ chorismate mutase | chr3:11164393-11166416 REVERSE ||| indole-3-glycerol phosphate synthase (IGPS) | chr2:1531148-1533737 FORWARD
RNA.regulation of transcription.ARF, Auxin Response Factor family	1	16	0.431906	0.935003	AT5G62000, AT2G33310, AT1G61140, AT5G05130, AT1G21700, AT3G12810, AT3G06400, AT3G54280, AT3G20010, AT1G34355, AT1G44810	Symbols: ARF2, ARF1-BP, HSS | ARF2 (AUXIN RESPONSE FACTOR 2); protein binding / transcription factor | chr5:24910358-24915214 FORWARD ||| Symbols: IAA13 | IAA13; transcription factor | chr2:14114281-14115969 REVERSE ||| Symbols: EDA16 | EDA16 (embryo sac development arrest 16); ATP binding / DNA binding / helicase/ nucleic acid binding / protein binding / zinc ion binding | chr1:22534717-22540850…
misc.myrosinases-lectin-jacalin	2	28	0.498202	0.938595	AT1G33790, AT5G38550	jacalin lectin family protein | chr1:12256664-12260605 FORWARD ||| jacalin lectin family protein | chr5:15432781-15435779 REVERSE
RNA.regulation of transcription.bZIP transcription factor family	2	29	0.479719	0.94775	AT5G06960, AT5G06950	Symbols: OBF5, TGA5 | OBF5 (OCS-ELEMENT BINDING FACTOR 5); DNA binding / protein binding / transcription factor | chr5:2154780-2157646 FORWARD ||| Symbols: AHBP-1B, TGA2 | AHBP-1B; DNA binding / transcription activator/ transcription factor/ transcription repressor | chr5:2151025-2154553 FORWARD
micro RNA, natural antisense etc	15	151	0.713085	0.949968	AT4G26095, AT5G01595, AT1G01448, AT1G26973, AT5G01215, AT2G44255, AT1G68568, AT5G01175, AT2G42365, AT2G25011, AT5G53048, AT5G48775, AT2G15128, AT1G66173, AT1G31485	other RNA | chr4:13224338-13227622 REVERSE ||| other RNA | chr5:227024-230013 FORWARD ||| other RNA | chr1:163431-166239 FORWARD ||| Symbols: MIR395A, MIR395 | MIR395A; miRNA | chr1:9363196-9363288 REVERSE ||| other RNA | chr5:84307-85917 REVERSE ||| other RNA | chr2:18295756-18297567 REVERSE ||| other RNA | chr1:25746977-25747654 REVERSE ||| other RNA | chr5:60208-61214 FORWARD ||| other RNA | c…
cell wall.cell wall proteins	4	51	0.550904	0.952913	AT5G14380, AT5G55730, AT5G60490, AT4G14900	Symbols: AGP6 | AGP6 (Arabinogalactan proteins 6) | chr5:4635797-4636676 REVERSE ||| Symbols: FLA1 | FLA1 (FASCICLIN-LIKE ARAB INOGALACTAN 1) | chr5:22558148-22560461 REVERSE ||| Symbols: FLA12 | FLA12 | chr5:24325727-24326702 REVERSE ||| hydroxyproline-rich glycoprotein family protein | chr4:8521522-8523705 REVERSE
PS.lightreaction.photosystem II	1	18	0.381044	0.952913	AT2G05100	Symbols: LHCB2.1, LHCB2 | LHCB2.1; chlorophyll binding | chr2:1823240-1824425 REVERSE
protein.degradation.cysteine protease	6	72	0.588226	0.958924	AT1G20850, AT1G55350, AT3G06910, AT3G26530, AT5G17080, AT5G03330	Symbols: XCP2 | XCP2 (xylem cysteine peptidase 2); cysteine-type peptidase/ peptidase | chr1:7252174-7253731 FORWARD ||| Symbols: DEK1, ATDEK1 | DEK1 (DEFECTIVE KERNEL 1); calcium-dependent cysteine-type endopeptidase/ cysteine-type endopeptidase | chr1:20653820-20664622 REVERSE ||| Symbols: ULP1A | ULP1A (UB-LIKE PROTEASE 1A); SUMO-specific protease/ cysteine-type peptidase | chr3:2178630-218119…
redox	7	82	0.603808	0.959674	AT4G08930, AT3G54960, AT2G17420, AT2G01270, AT5G38630, AT4G33670, AT1G32760	Symbols: ATAPRL6 | ATAPRL6 (APR-like 6) | chr4:5729192-5730850 FORWARD ||| Symbols: ATPDIL1-3, PDI1, ATPDI1 | ATPDIL1-3 (PDI-LIKE 1-3); protein disulfide isomerase | chr3:20363310-20366840 REVERSE ||| Symbols: NTRA, ATNTRA, NTR2 | NTRA (NADPH-DEPENDENT THIOREDOXIN REDUCTASE A); thioredoxin-disulfide reductase | chr2:7564345-7566539 FORWARD ||| Symbols: AtQSOX2 | AtQSOX2 (quiescin-sulfhydryl oxida…
RNA.regulation of transcription.C2H2 zinc finger family	4	53	0.528348	0.960331	AT1G27730, AT1G43850, AT1G34370, AT3G20880	Symbols: STZ, ZAT10 | STZ (salt tolerance zinc finger); nucleic acid binding / transcription factor/ transcription repressor/ zinc ion binding | chr1:9648141-9649073 REVERSE ||| Symbols: SEU | SEU (seuss); DNA binding / protein binding / protein heterodimerization/ transcription cofactor | chr1:16617152-16622049 FORWARD ||| Symbols: STOP1 | STOP1 (sensitive to proton rhizotoxicity 1); nucleic aci…
protein.targeting.chloroplast	1	20	0.34089	0.965748	AT5G03940	Symbols: FFC, 54CP, CPSRP54, SRP54CP | CPSRP54 (CHLOROPLAST SIGNAL RECOGNITION PARTICLE 54 KDA SUBUNIT); 7S RNA binding / GTP binding / mRNA binding / signal sequence binding | chr5:1060134-1063319 REVERSE
PS.lightreaction	3	44	0.473631	0.965825	AT2G05100, AT1G33785, AT3G16250	Symbols: LHCB2.1, LHCB2 | LHCB2.1; chlorophyll binding | chr2:1823240-1824425 REVERSE ||| Cytochrome B6, pseudogene, similar to Cytochrome B6. (Mouse-ear cress) {Arabidopsis thaliana}; blastp match of 61% identity and 7.1e-17 P-value to GP|2959637|gb|AAC05628.1||AF001491 cytochrome b6 {Prochlorococcus marinus str. MIT 9303} | chr1:12255360-12256256 REVERSE ||| Symbols: NDF4 | NDF4 (NDH-DEPENDENT …
secondary metabolism.flavonoids	2	33	0.417708	0.965825	AT1G56650, AT4G13660	Symbols: PAP1, MYB75, SIAA1, ATMYB75 | PAP1 (PRODUCTION OF ANTHOCYANIN PIGMENT 1); DNA binding / transcription factor | chr1:21233595-21235137 REVERSE ||| Symbols: ATPRR2, PRR2 | PRR2 (PINORESINOL REDUCTASE 2); pinoresinol reductase | chr4:7946155-7948376 FORWARD
DNA.synthesis/chromatin structure.retrotransposon/transposase.hat-like transposase	5	67	0.521729	0.972929	AT4G16935, AT5G26233, AT4G07874, AT3G14800, AT2G15160	transposable element gene | chr4:9530699-9530924 FORWARD ||| transposable element gene | chr5:9179752-9180539 REVERSE ||| transposable element gene | chr4:4697429-4699601 REVERSE ||| transposable element gene | chr3:4967160-4970274 REVERSE ||| transposable element gene | chr2:6579903-6581815 REVERSE
RNA.regulation of transcription.WRKY domain transcription factor family	1	25	0.269782	0.988756	AT4G26640	Symbols: WRKY20, AtWRKY20 | WRKY20; transcription factor | chr4:13437071-13440835 REVERSE
not assigned	784	6312	0.877968	1	AT3G16260, AT5G04990, AT4G34480, AT3G43880, AT4G27870, AT1G42470, AT3G09850, AT1G75200, AT5G23940, AT3G18845, AT1G65483, AT1G59650, AT5G01460, AT3G14120, AT4G28070, AT5G65280, AT2G46060, AT1G60990, AT1G33680, AT1G61150, AT1G80970, AT5G59490, AT5G35560, AT5G06265, AT5G53050, AT4G15520, AT5G05520, AT3G48650, AT2G15280, AT4G16765, AT5G53730, AT1G61900, AT1G60995, AT3G07180, AT5G10950, AT5G58780, AT1…	Symbols: TRZ4 | TRZ4 (TRNASE Z 4); 3-tRNA processing endoribonuclease/ catalytic | chr3:5509374-5513204 FORWARD ||| sad1/unc-84 protein-related | chr5:1471481-1473964 REVERSE ||| catalytic/ cation binding / hydrolase, hydrolyzing O-glycosyl compounds | chr4:16480934-16483995 REVERSE ||| unknown protein | chr3:15738173-15738616 REVERSE ||| integral membrane family protein | chr4:13878923-13882882 …
not assigned.unknown	523	4626	0.775476	1	AT2G05171, AT2G15292, AT2G17043, AT2G22088, AT3G28611, AT1G76780, AT5G20580, AT1G56660, AT5G22390, AT4G16180, AT1G75120, AT2G48060, AT1G13390, AT4G18000, AT3G26147, AT5G17090, AT3G59840, AT5G39200, AT4G10360, AT1G50900, AT5G62240, AT5G40860, AT3G47200, AT2G01960, AT5G18720, AT4G39450, AT3G12012, AT5G49900, AT4G15075, AT1G77765, AT5G52110, AT2G18870, AT5G45275, AT5G26230, AT5G32515, AT3G42440, AT3…	Pseudogene of AT3G18310 | chr2:1874040-1874997 FORWARDmoderately similar to ( 223)AT3G18310similar to hypothetical protein [Vitis vinifera] (GB:CAN64638.1) | chr3:6284529-6287150 REVERSE ||| Unknown gene | chr2:6644281-6645533 REVERSE ||| unknown protein | chr2:7409063-7409582 FORWARDweakly similar to ( 145)AT2G17070similar to unknown protein [Arabidopsis thaliana] (TAIR:AT2G17080.1); similar to …
DNA	191	2716	0.444449	1	AT5G33436, AT5G39770, AT2G45230, AT3G16840, AT5G06260, AT2G11190, AT2G41460, AT4G01020, AT1G22580, AT5G18620, AT5G26680, AT5G04980, AT1G35530, AT4G15590, AT1G63210, AT2G17910, AT3G10690, AT1G16800, AT5G11350, AT5G27680, AT4G15850, AT4G14460, AT5G55920, AT5G63920, AT2G14050, AT1G31500, AT2G35920, AT2G03390, AT3G43862, AT3G09100, AT1G51750, AT3G45590, AT1G14460, AT5G55300, AT3G04260, AT2G14930, AT1…	pseudogene, similar to putative reverse transcriptase., blastp match of 24% identity and 1.2e-12 P-value to GP|21450442|gb|AAM54146.1|AC104616_5|AC104616 putative reverse transcriptase. {Oryza sativa (japonica cultivar-group)} | chr5:12734109-12735277 REVERSE ||| DNA binding / endonuclease/ nuclease/ nucleic acid binding / protein binding | chr5:15919241-15927549 REVERSE ||| transposable element …
DNA.synthesis/chromatin structure	162	2493	0.409096	1	AT5G33436, AT5G39770, AT2G45230, AT3G16840, AT5G06260, AT2G11190, AT2G41460, AT4G01020, AT1G22580, AT5G18620, AT5G26680, AT5G04980, AT1G35530, AT4G15590, AT1G63210, AT2G17910, AT3G10690, AT1G16800, AT5G11350, AT5G27680, AT4G15850, AT4G14460, AT5G55920, AT5G63920, AT2G14050, AT1G31500, AT2G35920, AT2G03390, AT3G43862, AT3G09100, AT1G51750, AT3G45590, AT1G14460, AT5G55300, AT3G04260, AT2G14930, AT1…	pseudogene, similar to putative reverse transcriptase., blastp match of 24% identity and 1.2e-12 P-value to GP|21450442|gb|AAM54146.1|AC104616_5|AC104616 putative reverse transcriptase. {Oryza sativa (japonica cultivar-group)} | chr5:12734109-12735277 REVERSE ||| DNA binding / endonuclease/ nuclease/ nucleic acid binding / protein binding | chr5:15919241-15927549 REVERSE ||| transposable element …
DNA.synthesis/chromatin structure.retrotransposon/transposase	104	2044	0.316778	1	AT4G01525, AT3G42430, AT4G04400, AT5G34862, AT2G12570, AT3G30418, AT5G35046, AT4G06562, AT4G06734, AT3G29577, AT5G30276, AT3G30825, AT1G43060, AT5G38705, AT3G33055, AT2G11700, AT5G31770, AT4G06752, AT4G06532, AT4G08112, AT4G07664, AT4G07492, AT5G34985, AT5G33433, AT2G10890, AT3G42431, AT4G06563, AT2G11450, AT3G43864, AT3G33106, AT2G12760, AT4G05613, AT4G06514, AT5G28845, AT3G32210, AT3G60935, AT1…	Symbols: SADHU5-1 | transposable element gene | chr4:660810-661698 FORWARD ||| transposable element gene | chr3:14543380-14544510 FORWARD ||| transposable element gene | chr4:2161216-2163867 REVERSE ||| transposable element gene | chr5:13143974-13147606 REVERSE ||| transposable element gene | chr2:5127430-5130440 REVERSE ||| transposable element gene | chr3:12050702-12056135 REVERSE ||| transposa…
DNA.synthesis/chromatin structure.retrotransposon/transposase.gypsy-like retrotransposon	39	778	0.330814	1	AT5G34862, AT2G12570, AT3G30418, AT5G35046, AT4G06562, AT4G06734, AT3G29577, AT5G30276, AT3G30825, AT1G43060, AT5G38705, AT3G33055, AT2G11700, AT5G31770, AT4G06752, AT4G06532, AT4G08112, AT4G07664, AT4G07492, AT5G34985, AT5G33433, AT2G10890, AT3G42431, AT4G06563, AT2G11450, AT3G43864, AT3G33106, AT2G12760, AT4G05613, AT4G06514, AT5G28845, AT3G32210, AT3G60935, AT1G41690, AT3G32000, AT3G30802, AT4…	transposable element gene | chr5:13143974-13147606 REVERSE ||| transposable element gene | chr2:5127430-5130440 REVERSE ||| transposable element gene | chr3:12050702-12056135 REVERSE ||| transposable element gene | chr5:13301420-13304806 FORWARD ||| transposable element gene | chr4:3493210-3494235 FORWARD ||| transposable element gene | chr4:4036982-4039699 FORWARD ||| transposable element gene |…
DNA.synthesis/chromatin structure.retrotransposon/transposase.copia-like retrotransposon	20	381	0.353541	1	AT1G50810, AT3G29578, AT2G17115, AT2G05845, AT1G70010, AT3G52705, AT1G21945, AT3G43867, AT5G19097, AT1G29475, AT4G03816, AT3G56277, AT5G33075, AT5G42645, AT3G60965, AT3G42233, AT3G28160, AT5G39095, AT2G14245, AT2G06830	transposable element gene | chr1:18828868-18832972 FORWARD ||| transposable element gene | chr3:11392690-11393979 REVERSE ||| transposable element gene | chr2:7448945-7453891 REVERSE ||| transposable element gene | chr2:2236521-2238590 REVERSE ||| transposable element gene | chr1:26367177-26371457 FORWARD ||| transposable element gene | chr3:19533920-19534238 REVERSE ||| transposable element gene…
DNA.synthesis/chromatin structure.retrotransposon/transposase.CACTA-like transposase	12	323	0.246213	1	AT3G33045, AT3G42721, AT3G29739, AT2G13160, AT2G14230, AT1G42500, AT3G32240, AT1G40123, AT1G39190, AT5G32825, AT3G29734, AT3G29736	transposable element gene | chr3:13579593-13580782 REVERSE ||| transposable element gene | chr3:14831701-14835583 REVERSE ||| transposable element gene | chr3:11575683-11577116 FORWARD ||| transposable element gene | chr2:5441880-5444055 FORWARD ||| transposable element gene | chr2:6027499-6029693 REVERSE ||| transposable element gene | chr1:15951375-15953706 REVERSE ||| transposable element gene…
DNA.synthesis/chromatin structure.retrotransposon/transposase.mutator-like transposase	8	217	0.245519	1	AT5G35657, AT5G48965, AT3G59860, AT4G05306, AT1G64270, AT5G27190, AT3G30455, AT3G43360	transposable element gene | chr5:13848348-13851110 REVERSE ||| transposable element gene | chr5:19853991-19856859 FORWARD ||| transposable element gene | chr3:22113851-22114908 REVERSE ||| transposable element gene | chr4:2710556-2713433 REVERSE ||| transposable element gene | chr1:23850572-23852785 FORWARD ||| transposable element gene | chr5:9567920-9571164 REVERSE ||| transposable element gene…
DNA.synthesis/chromatin structure.retrotransposon/transposase.non-LTR retrotransposon	16	213	0.52318	1	AT5G27905, AT3G43315, AT2G14940, AT5G26582, AT3G44650, AT1G60310, AT5G28405, AT3G28705, AT2G05280, AT4G03813, AT2G12580, AT3G28865, AT3G43546, AT5G27845, AT5G13485, AT2G13520	transposable element gene | chr5:9925219-9930411 FORWARD ||| transposable element gene | chr3:15271837-15275043 REVERSE ||| transposable element gene | chr2:6435725-6438806 FORWARD ||| transposable element gene | chr5:9388756-9392082 REVERSE ||| transposable element gene | chr3:16209849-16212164 REVERSE ||| transposable element gene | chr1:22231188-22232737 REVERSE ||| transposable element gene |…
